# Supplementary material
Source: PubMed Central journal article supplement (PMC2885888)
Supplement: NIHMS120154-supplement-4_si_004.pdf [file NIHMS120154-supplement-4_si_004.pdf]

# Effect of Ligand Steric Properties and Halide Identity on the Mechanisms for Oxidative Addition of Haloarenes to Trialkylphosphine Pd(0) Complexes

Fabiola Barrios-Landeros, Brad P. Carrow, and John F. Hartwig

*Department of Chemistry, University of Illinois, 600 South Mathews Av, Urbana, IL 61801 and Department of Chemistry, Yale University, P.O. Box 208107, New Haven, Connecticut 06520-8107*

## Supporting Information

### Experimental Section

**General Methods.** All manipulations were conducted in an inert atmosphere dry box or using standard Schlenk techniques unless otherwise specified.  $^1\text{H}$  spectra were recorded on a 400 or 500 MHz spectrometer;  $^{13}\text{C}$  spectra were recorded at 125 MHz with solvent resonances as reference;  $^{31}\text{P}\{^1\text{H}\}$  NMR spectra were recorded at 160 or 200 MHz with external  $\text{H}_3\text{PO}_4$  as a reference.  $\text{CH}_2\text{Cl}_2$ , THF, diethyl ether, toluene, and pentane were dried with a solvent purification system containing a 1 m column with activated alumina. All reagents were obtained from commercial sources and used without further purification. The solvents and haloarenes were added to the kinetic experiment samples with a micropipette. For volumes lower than 10  $\mu\text{L}$ , a microsyringe was used.

**Synthesis of  $[(\text{P}^t\text{Bu}_3)\text{Pd}(\text{Ph})(\text{Cl})]_2$  (**9**).** In a Schlenk flask was placed 100 mg (0.26 mmol) of  $(\text{Py})_2\text{Pd}(\text{Ph})(\text{Cl})$  (**20**) and 107.3 mg (0.52 mmol) of  $\text{P}^t\text{Bu}_3$ . The solids were suspended in 10 mL of toluene. The reaction mixture was stirred at room temperature for 30 min. The solvent was evaporated under vacuum to leave a yellow and white residue.

The flask was brought into the glove box, and the solid was treated with toluene. The yellow product dissolved in the toluene, and the white starting material remained. The yellow solution was then filtered, and the solvent was evaporated under vacuum. The resulting solid was washed with pentane and dried under vacuum to yield 47.5 mg (42% yield) of yellow product.  $^1\text{H}$  NMR ( $\text{C}_6\text{D}_6$ , 400 MHz)  $\delta$  7.48 (ddd,  $J = 8.0, 3.0, 1.0$  Hz, 2H), 6.86 (t,  $J = 7.5$  Hz, 2H), 6.78 (tt,  $J = 6.7, 1.5$  Hz, 1H), 1.30 (d,  $J = 12.0$  Hz, 27H);  $^{13}\text{C}$  NMR ( $\text{C}_6\text{D}_6$ , 125 MHz)  $\delta$  143.22, 138.31 (d,  $J = 2.3$  Hz), 127.18 (d,  $J = 1.8$  Hz), 123.72, 41.27 (d,  $J = 7.9$  Hz), 33.51 (d,  $J = 3.9$  Hz);  $^{31}\text{P}\{^1\text{H}\}$  NMR ( $\text{C}_6\text{D}_6$ )  $\delta$  72.8. Anal. calcd. for  $\text{C}_{18}\text{H}_{32}\text{ClPPd}$ : C, 51.32; H, 7.66. Found: C, 51.60; H, 7.80.

**Synthesis of  $[(\text{P}^t\text{Bu}_3)\text{Pd}(\text{2-CF}_3\text{-C}_6\text{H}_4)(\text{Cl})]_2$  (10).** Into a Schlenk flask was placed 200 mg (0.39 mmol) of  $\text{Pd}(\text{P}^t\text{Bu}_3)_2$ . The solid was dissolved in 15 mL of  $\text{2-CF}_3\text{-C}_6\text{H}_4\text{Cl}$ , and the resulting solution was heated under nitrogen at  $80\text{ }^\circ\text{C}$  for 1 h. The solvent was evaporated under vacuum at  $50\text{ }^\circ\text{C}$ , and the resulting orange residue was redissolved in toluene. The resulting solution was filtered, concentrated, layered with pentane. Cooling at  $-35\text{ }^\circ\text{C}$  generated 114 mg of orange product (0.23 mmol, 59% yield). Recrystallization of the product in toluene layered with pentane yielded crystals suitable for X-ray diffraction.  $^1\text{H}$  NMR ( $\text{C}_6\text{D}_6$ , 400 MHz)  $\delta$  1.26 (d,  $J = 12.4$  Hz, 27H), 6.67 (br, 1H), 6.74 (br, 1H), 7.35 (br, 1H), 7.84 (br, 1H);  $^{13}\text{C}$  NMR ( $\text{CD}_2\text{Cl}_2$ , 125 MHz) 139.95, 138.49, 136.09 (q,  $J = 28.7$  Hz), 128.21, 127.48, 124.86 (q,  $J = 273$  Hz), 123.69, 41.36 (d,  $J = 8.9$  Hz), 32.89 (d,  $J = 2.7$  Hz);  $^{31}\text{P}\{^1\text{H}\}$  NMR ( $\text{C}_6\text{D}_6$ )  $\delta$  70.8;  $^{19}\text{F}\{^1\text{H}\}$  NMR ( $\text{C}_6\text{D}_6$ , 375 MHz)  $\delta$   $-55.0$ . Anal. calcd. for  $\text{C}_{19}\text{H}_{31}\text{Cl}_1\text{F}_3\text{PPd}$ : C, 46.64; H, 6.39. Found: C, 46.90; H, 6.56.

**Determination of Molecular Weight in Solution<sup>1</sup> of [(P<sup>t</sup>Bu<sub>3</sub>)Pd(2-CF<sub>3</sub>-C<sub>6</sub>H<sub>4</sub>)(Cl)]<sub>2</sub> (10).** Into a 1.0 mL volumetric flask was placed 29.3 mg (0.0599 mol) of [(P<sup>t</sup>Bu<sub>3</sub>)Pd(2-CF<sub>3</sub>-C<sub>6</sub>H<sub>4</sub>)(Cl)]<sub>2</sub> (10), and the flask was filled with THF to the mark. The reference solution was prepared in a similar manner with 8.4 mg (0.045 mmol) of ferrocene. A Signer apparatus was loaded with 0.8 mL of the solution of the complex in one arm and 0.8 mL of the solution of ferrocene in the other arm. The solutions were frozen in liquid N<sub>2</sub>, and the apparatus was evacuated to about 20 mtorr. The apparatus was then allowed to stand at room temperature. The volume in each arm was measured periodically until the volumes were constant. From the final concentrations, the molecular weight was calculated to be 530 g/mol. The molecular weight of the monomeric complex would be 489.29 g/mol, and the molecular weight of the dimeric complex would be 978.58 g/mol. The molecular weight calculated by the same method in C<sub>6</sub>H<sub>6</sub> solvent is 505 g/mol.

**Independent synthesis of [(1-AdP<sup>t</sup>Bu<sub>2</sub>)Pd(Ph)(Cl)]<sub>2</sub> (11).** The complex was obtained following a procedure previously reported by reaction of tetraoctylammonium chloride with (1-AdP<sup>t</sup>Bu<sub>2</sub>)Pd(Ph)(CF<sub>3</sub>SO<sub>3</sub>).<sup>2</sup> In a small vial, 30 mg (0.049 mmol) of (1-AdP<sup>t</sup>Bu<sub>2</sub>)Pd(Ph)(CF<sub>3</sub>SO<sub>3</sub>) was dissolved in 1 mL of toluene. In a separate vial, N(octyl)<sub>4</sub>Cl (26mg, 0.052 mmol) was dissolved in 1 mL of toluene. The chloride solution was added dropwise to the stirring vial containing the Pd solution. The reaction was stirred for 2 min. At this time, the reaction was filtered through a plug of Celite and concentrated to approximately 1 mL. The resulting bright yellow solution was layered with pentane and cooled to -35 °C. After 16 h, bright yellow crystals and colorless

crystals formed in the vial. The crystals were washed repeatedly with ether until only the yellow crystals remained. These crystals were dried under vacuum to yield 21 mg of product (86% yield). Crystals suitable for X-ray diffraction were obtained by recrystallization from toluene solution layered with pentane at  $-35\text{ }^{\circ}\text{C}$ .  $^1\text{H}$  NMR ( $\text{C}_6\text{D}_6$ , 400 MHz)  $\delta$  7.54 – 7.57 (m, 2H), 6.89 (t,  $J = 7.2$  Hz, 2H), 6.80 (t,  $J = 7.2$  Hz, 1H), 2.38 (br s, 6H), 1.81 (br, 3H), 1.50 – 1.63 (br m, 6H), 1.23 (d,  $J = 12.0$  Hz, 18H);  $^{13}\text{C}$  NMR ( $\text{C}_6\text{D}_6$ , 100 MHz)  $\delta$  141.8, 138.2 (d,  $J = 3.0$  Hz), 127.3 (br), 123.8, 47.8 (d,  $J = 6.0$  Hz), 42.0, 41.5 (d,  $J = 7.8$  Hz), 36.9, 33.6 (d,  $J = 2.2$  Hz), 29.9 (d,  $J = 8.1$  Hz);  $^{31}\text{P}\{^1\text{H}\}$  NMR ( $\text{C}_6\text{D}_6$ )  $\delta$  69.2. Anal. calcd. for  $\text{C}_{24}\text{H}_{38}\text{ClPPd}$ : C, 57.72; H, 7.67. Found: C, 57.73; H, 7.92.

**Independent synthesis of [(1-AdP<sup>t</sup>Bu<sub>2</sub>)Pd(2-CF<sub>3</sub>-C<sub>6</sub>H<sub>4</sub>)(Cl)]<sub>2</sub> (12).** In a small vial, 150 mg (0.225 mmol) Pd(1-AdP<sup>t</sup>Bu<sub>2</sub>)<sub>2</sub> (**2**) was suspended in 6.74 mL (50.6 mmol) *o*-chlorobenzotrifluoride. The mixture was heated in an oil bath at  $100\text{ }^{\circ}\text{C}$  with stirring for 20 min. The resulting orange solution was concentrated to dryness under vacuum. The residue was next triturated with 3 mL acetonitrile for 1.5 hrs. The resulting yellow precipitate was collected and washed with 4x1 mL pentane. The process was repeated a second time, and the resulting solid was dried under vacuum to give 50 mg (39%, 0.089 mmol) **12**. Crystals suitable for X-ray diffraction were obtained by slow evaporation of a THF solution at room temperature.  $^1\text{H}$  NMR ( $\text{C}_6\text{D}_6$ , 500 MHz)  $\delta$  1.28 (br, 18H), 1.50 (br, 3H), 1.58 (br, 3H), 1.80 (br, 3H), 2.42 (br, 6H), 6.64 (br, 1H), 6.75 (br, 1H), 7.31 (br, 1H), 7.92 (br, 1H);  $^{13}\text{C}$  NMR ( $\text{C}_6\text{D}_6$ , 125 MHz) 139.94, 139.01, 136.57 (q,  $J = 27.3$  Hz), 128.53, 127.63, 125.48 (q,  $J = 27.4$  Hz), 123.61, 47.69 (d,  $J = 5.8$  Hz), 41.53 (d,  $J = 6.9$  Hz), 41.30, 36.58, 33.25 (br), 29.50;  $^{31}\text{P}\{^1\text{H}\}$  NMR ( $\text{C}_6\text{D}_6$ , 200 MHz)  $\delta$  70.6;  $^{19}\text{F}\{^1\text{H}\}$

NMR ( $C_6D_6$ , 470 MHz)  $\delta$  -54.9. Anal. calcd. for  $C_{25}H_{37}ClF_3PPd$ : C, 52.92; H, 6.57. Found: C, 53.10; H, 6.84.

**Independent synthesis of  $[(CyP^tBu_2)_2Pd(3,5-(CF_3)_2C_6H_3)(I)]_2$  (13).** Inside the glove box, 100 mg (0.18 mmol) of  $Pd(CyP^tBu_2)_2$  (**3**) was weighed into a small vial, and 300  $\mu$ L of 3,5- $(CF_3)_2C_6H_3I$  and 3 mL of toluene were added. The reaction mixture was stirred at room temperature for 2 h, after which time the solvent and excess iodoarene was evaporated under vacuum. The yellow product was redissolved in toluene, and the solution was filtered, concentrated, layered with pentane and cooled at  $-35$   $^{\circ}C$ . After a second recrystallization under the same conditions, 60.7 mg (51%, 0.090 mmol) of yellow solid was obtained.  $^1H$  NMR ( $C_6D_6$ , 400 MHz)  $\delta$  8.08 (s, 2H), 6.86 (s, 1H), 1.68 (br, 3H), 1.09 (br, 4H), 0.85 (br, 18H), 0.52 (br, 2H), 0.40 (br, 2H);  $^{13}C$  NMR ( $CD_2Cl_2$ , 125 MHz)  $\delta$  155.64, 138.53, 128.90 (q,  $J = 31.9$  Hz), 124.48 (q,  $J = 272.7$  Hz), 116.79 (m), 41.06, 39.74 (d,  $J = 11.1$  Hz), 32.49, 31.73, 28.28 (d,  $J = 9.7$  Hz), 26.74;  $^{19}F\{^1H\}$  NMR ( $C_6D_6$ , 375 MHz)  $\delta$  -65.0;  $^{31}P\{^1H\}$  NMR ( $C_6D_6$ )  $\delta$  63.3 (br). Anal. calcd for  $C_{22}H_{32}F_6IPPd$ : C, 39.16; H, 4.78. Found: C, 39.28; H, 4.72.

**Independent synthesis of  $[(CyP^tBu_2)_2Pd(Ph)(I)]_2$  (14).** Inside the glove box, 100 mg (0.18 mmol) of  $Pd(CyP^tBu_2)_2$  (**3**) was weighed into a small vial and mixed with 1.5 mL of PhI. The reaction was stirred at 60  $^{\circ}C$  for 40 min, after which time the excess PhI was evaporated under vacuum. The yellow product was dissolved in toluene, and the resulting solution was filtered, concentrated, and layered with pentane. Cooling at  $-35$   $^{\circ}C$  and recrystallization of the resulting yellow solid by layering a toluene solution with pentane

yielded 42.2 mg (44%, 0.078 mmol) of yellow powder.  $^1\text{H}$  NMR ( $\text{C}_6\text{D}_6$ , 500 MHz)  $\delta$  7.46 (d,  $J = 7.3$  Hz, 2H), 6.88 (t,  $J = 7.3$ , 2H), 6.74 (t,  $J = 6.7$  Hz, 1H), 2.27 (br, 2H), 2.09 (br, 1H), 1.61 (br, 4H), 1.48 (d,  $J = 10.4$  Hz, 18H), 1.15 (br m, 2H), 0.87 (br, 2H);  $^{13}\text{C}$  NMR ( $\text{CD}_2\text{Cl}_2$ , 125 MHz)  $\delta$  152.39, 138.48, 127.25, 122.64, 40.04 (br), 39.09 (d,  $J = 10.3$  Hz), 32.33, 31.67, 28.06 (d,  $J = 9.8$  Hz), 26.70;  $^{31}\text{P}\{^1\text{H}\}$  NMR ( $\text{CD}_2\text{Cl}_2$ )  $\delta$  59.8. Anal. calcd for  $\text{C}_{20}\text{H}_{34}\text{IPPd}$ : C, 44.58, H, 6.36. Found: C, 44.86; H, 6.26.

**Independent synthesis of  $[(\text{CyP}^t\text{Bu}_2)\text{Pd}(\text{Ph})(\text{Br})]_2$  (15).** Inside the glove box, 100 mg (0.18 mmol) of  $\text{Pd}(\text{CyP}^t\text{Bu}_2)_2$  (3) was weighed into a small vial, and mixed with 3.0 mL of PhBr. The reaction mixture was stirred at 70 °C for 1 h, after which time the excess bromobenzene was evaporated under vacuum. The yellow product was redissolved in toluene, and the solution was filtered, concentrated, layered with pentane and cooled at -35 °C. After a second recrystallization, 61.1 mg (70%, 0.12 mmol) of yellow solid was obtained. Crystals suitable for X-ray diffraction were obtained upon further recrystallization of the product under the same conditions.  $^1\text{H}$  NMR ( $\text{C}_6\text{D}_6$ , 500 MHz)  $\delta$  7.64 (d,  $J = 6.5$  Hz, 2H), 6.94 (t,  $J = 7.3$  Hz, 2H), 6.82 (t,  $J = 7.0$  Hz, 1H), 2.16 (br, 3H), 1.5 – 1.2 (br, 5H), 1.37 (d,  $J = 11.5$  Hz, 18H), 0.91 (br m, 1H), 0.77 (br, 2H);  $^{13}\text{C}$  NMR ( $\text{C}_6\text{D}_6$ , 125 MHz)  $\delta$  150.51, 137.84, 127.37, 123.47, 39.65 (d,  $J = 10.6$  Hz), 39.00 (d,  $J = 11.6$  Hz), 32.39, 31.93, 28.32 (d,  $J = 8.5$  Hz), 27.04;  $^{31}\text{P}\{^1\text{H}\}$  NMR ( $\text{C}_6\text{D}_6$ )  $\delta$  62.58. Anal. calcd. For  $\text{C}_{20}\text{H}_{34}\text{BrPPd}$ : C, 48.85; H, 6.97. Found: C, 50.08; H, 6.9.

**Determination of Molecular Weight in Solution<sup>1</sup> of  $[(\text{CyP}^t\text{Bu}_2)\text{Pd}(\text{Ph})(\text{Br})]_2$  (15).** Into a 1.0 mL volumetric flask was placed 11 mg (0.011 mmol) of  $[(\text{CyP}^t\text{Bu}_2)\text{Pd}(\text{Ph})(\text{Br})]_2$

(15), and the flask was filled with THF to the mark. The reference solution was prepared in a similar manner with 3.3 mg (0.018 mmol) of ferrocene. A Signer apparatus was loaded with 1.0 mL of the solution of the complex in one arm and 1.0 mL of the solution of ferrocene in the other arm. The solutions were frozen in liquid N<sub>2</sub>, and the apparatus was evacuated to about 50 mTorr. The apparatus was then allowed to stand at room temperature. The volume in each arm was measured periodically until the volumes were constant. From the final concentrations, the molecular weight was calculated to be 523 g/mol. The molecular weight of the monomeric complex would be 491.78 g/mol, and the molecular weight of the dimeric complex would be 983.56 g/mol.

**Independent synthesis of [(CyP<sup>t</sup>Bu<sub>2</sub>)Pd(Ph)(Cl)]<sub>2</sub> (16).** Inside the glove box, 100 mg (0.18 mmol) of Pd(CyP<sup>t</sup>Bu<sub>2</sub>)<sub>2</sub> (3) was weighed into a small vial, and mixed with 3.0 mL of PhCl. The reaction mixture was stirred at 70 °C for 2 h, after which time the excess chlorobenzene was evaporated under vacuum. The yellow product was redissolved in toluene, and the solution was filtered, concentrated, layered with pentane and cooled at -35 °C. After a second recrystallization under the same conditions, 50.5 mg (64%, 0.11 mmol) of yellow solid was obtained. <sup>1</sup>H NMR (C<sub>6</sub>D<sub>6</sub>, 500 MHz) δ 7.62 (br, 2H), 6.94 (br, 2H), 6.84 (br m, 1H), 2.14 (br, 2H), 2.07 (br, 1H), 1.2–1.7 (br, 5H), 1.39 (d, *J* = 10.9 Hz, 18H), 0.89 (br m, 1H), 0.71 (br, 2H). <sup>13</sup>C NMR (C<sub>6</sub>D<sub>6</sub>, 125 MHz) δ 148.69, 137.04, 126.76, 123.14, 39.00 (d, *J* = 13.5), 38.40 (d, *J* = 13.0), 31.80, 31.42, 27.92 (d, *J* = 9.9), 26.63; <sup>31</sup>P{<sup>1</sup>H} NMR (C<sub>6</sub>D<sub>6</sub>) δ 64.06. Anal calcd For C<sub>20</sub>H<sub>34</sub>ClPPd: C, 53.70; H, 7.66. Found: C, 53.58; H, 7.52

**Synthesis of *trans*-(Py)<sub>2</sub>Pd(Ph)(Cl) (20).** In a Schlenk flask, was placed 800 mg of Pd<sub>2</sub>(dba)<sub>3</sub> (0.87 mmol) and 80 mg of P<sup>t</sup>Bu<sub>3</sub> (0.40 mmol). To these solids was added a mixture of 0.7 mL of pyridine (8.6 mmol) and 5 mL of PhCl. The reaction was stirred under N<sub>2</sub> at 45 °C for 1.5 h. (Py)<sub>2</sub>Pd(Ph)(Cl) precipitated from the reaction mixture as a white solid. This solid was rinsed with ether and redissolved in CH<sub>2</sub>Cl<sub>2</sub>. The solution was filtered through plug of Celite and layered with pentane at -35 °C. The resulting white crystalline solid was isolated by filtration and dried under vacuum to obtain 361 mg (55 % yield) of product. <sup>1</sup>H NMR (CD<sub>2</sub>Cl<sub>2</sub>, 400 MHz) δ 8.81 (dt, *J* = 5.2, 1.5 Hz, 4H), 7.73 (tt, *J* = 7.6, 1.6 Hz, 2H), 7.25 (ddd, *J* = 7.5, 5.3, 1.6 Hz, 4H), 7.19 (dd, *J* = 7.4, 0.9 Hz, 2H) 6.86 (m, 3H) ; <sup>13</sup>C NMR (CD<sub>2</sub>Cl<sub>2</sub>, 125 MHz) δ 153.42, 153.21, 138.07, 134.31, 127.46, 125.00, 123.91. Anal. calcd. for C<sub>16</sub>H<sub>15</sub>ClN<sub>2</sub>Pd: C, 50.95; H, 4.01. Found: C, 50.72; H, 3.83.

**General procedure for kinetic experiments.** The amounts and reagents used to prepare each sample are described below. The solvents and haloarenes were added to the samples with a micropipette. The sample solutions were transferred to a screw top NMR tube and capped with a Teflon septum. A sealed capillary tube with a THF or DMF solution of H<sub>3</sub>PO<sub>4</sub> (0.35 M) was placed inside the NMR tube to be used as an external standard. Before inserting the sample into the NMR probe, the temperature was adjusted. The temperature was measured with a type K thermocouple; the thermocouple probe was inserted into an NMR sample tube, which was lowered inside the spectrometer probe. Once the temperature was stable, the tube with the sample was inserted into the NMR



probe and  $^{31}\text{P}$  NMR spectra were acquired at fixed time intervals throughout the length of experiment with the aid of an automated data collection program.

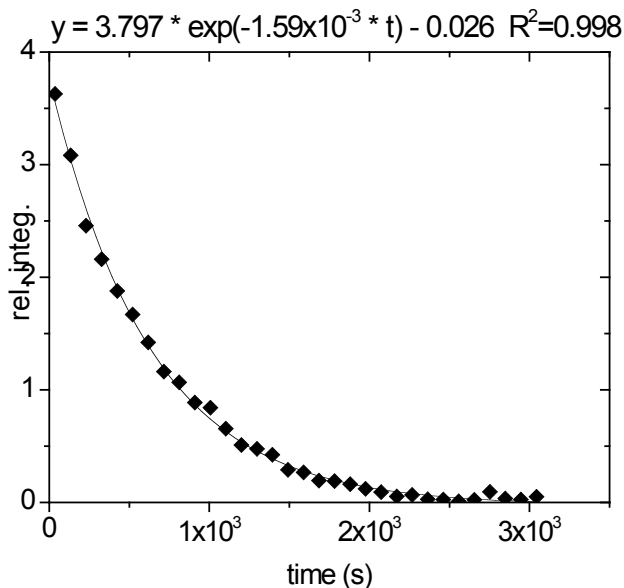

**Figure S1.** Representative decay of  $\text{Pd}(\text{P}^t\text{Bu}_3)_2$  (**1**) (0.040 M) in the presence of PhI (0.90 M) and  $\text{P}^t\text{Bu}_3$  (0.10 M) in chlorobenzene at 70 °C.

**Representative procedure for the oxidative addition of PhBr to  $\text{Pd}(\text{P}^t\text{Bu}_3)_2$  (**1**).** The palladium complex  $\text{Pd}(\text{P}^t\text{Bu}_3)_2$  (**1**) was weighed in a small vial (10.2 mg, 0.02 mmol). Into this vial was placed 40  $\mu\text{L}$  of a 2.5 M (0.1 mmol) solution of  $\text{P}^t\text{Bu}_3$ . Toluene (354  $\mu\text{L}$ ), PhBr (100  $\mu\text{L}$ , 0.95 mmol) and phosphazene base were added (6  $\mu\text{L}$ , 0.02 mmol) to the sample. The solution was transferred to a screw capped NMR tube, and the sample tube was placed into a preheated NMR spectrometer probe at 90°C. The disappearance of the Pd complex peak was monitored by  $^{31}\text{P}$  NMR spectroscopy with the aid of an automated acquisition program.

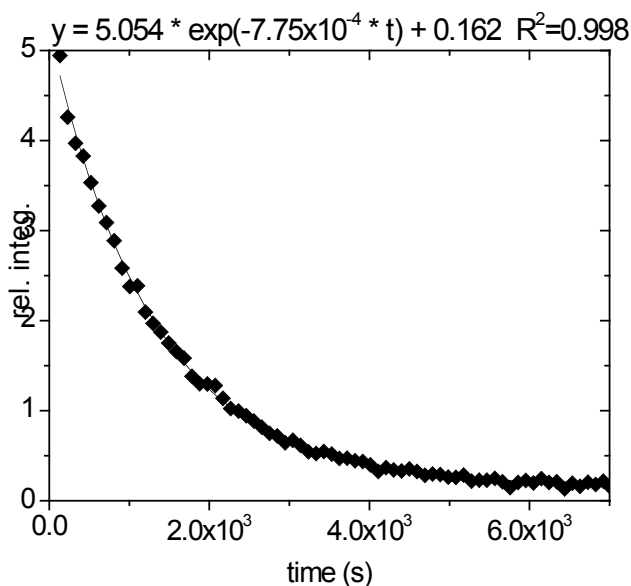

**Figure S2.** Representative decay of Pd(1-AdP<sup>t</sup>Bu<sub>2</sub>)<sub>2</sub> (**2**) (0.025 M) in the presence of PhBr (8.5 M), 1-AdP<sup>t</sup>Bu<sub>2</sub> (0.10 M), and *tert*-butylimino-trispyrrolidino phosphorane (0.015 M) in toluene at 90 °C.

**Representative procedure for the oxidative addition of ArX (X= I, Br, Cl) to Pd(1-AdP<sup>t</sup>Bu<sub>2</sub>)<sub>2</sub> (**2**).** Into a small vial was placed the palladium complex Pd(1-AdP<sup>t</sup>Bu<sub>2</sub>)<sub>2</sub> (6.7 mg, 0.010 mmol) and ligand 1-AdP<sup>t</sup>Bu<sub>2</sub> (28.0 mg, 0.10 mmol). The complex was suspended in 100 μL of toluene. The suspension was transferred to an NMR sample tube with a total of three portions of 100 μL of toluene and 100 μL ArX to ensure that all of the solid was transferred to the tube. Total sample volume equal 400 μL. Into the sample tube was added 2 μL (0.006 mmol) of phosphazene base. The sample was placed into the preheated probe at 80 – 100 °C. At this high temperature, the complex Pd(1-AdP<sup>t</sup>Bu<sub>2</sub>)<sub>2</sub> solubilized and the sample became homogeneous. The decay of the Pd complex was monitored by <sup>31</sup>P NMR spectroscopy with the aid of an automated acquisition program.

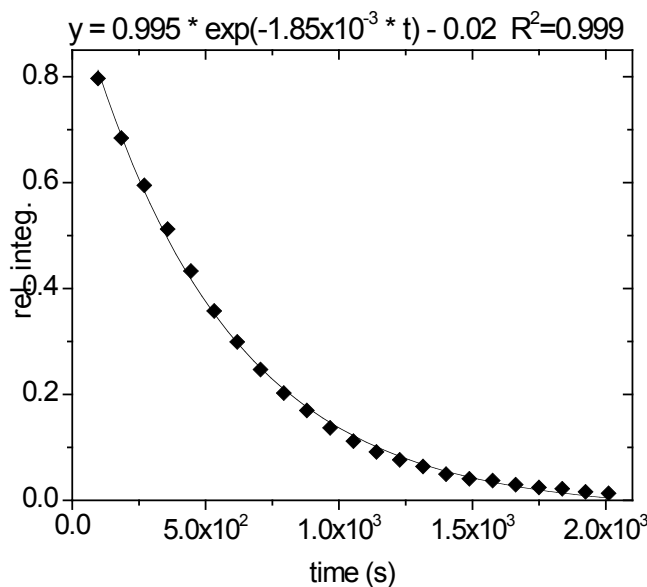

**Figure S3.** Representative decay of Pd(CyP<sup>t</sup>Bu<sub>2</sub>)<sub>2</sub> (**3**) (0.036 M) in the presence of PhI (0.45 M) in toluene at 50 °C.

**Representative procedure for the oxidative addition of PhX (X=I, Br, Cl) to Pd(CyP<sup>t</sup>Bu<sub>2</sub>)<sub>2</sub> (**3**).** Into a small vial, weighed the palladium complex Pd(CyP<sup>t</sup>Bu<sub>2</sub>)<sub>2</sub> (**3**) (10.2 mg, 0.018 mmol) and the ligand CyP<sup>t</sup>Bu<sub>2</sub> (22.8 mg, 0.10 mmol). The necessary amounts of toluene and PhX were added to the vial to adjust to the desired haloarene concentration and make the final volume 500 μL. The solution was transferred to a screw capped NMR tube, and the sample was placed into a preheated NMR spectrometer probe at 50 – 80°C. The decay of the Pd complex was measured by <sup>31</sup>P NMR spectroscopy with the aid of an automated acquisition program.

**Representative procedure for the oxidative addition of PhI to Pd(PCy<sub>3</sub>)<sub>2</sub> (**4**).** Into a small vial was weighed 141 mg of PCy<sub>3</sub> (0.503 mmol). This material was dissolved in

500  $\mu\text{L}$  of toluene to prepare a 1.00 M stock solution. Into a separate vial was weighed 6.3 mg (0.0094 mmol) of the palladium complex  $\text{Pd}(\text{PCy}_3)_2$  (**4**). To this vial, 30  $\mu\text{L}$  of the phosphine stock solution (0.030 mmol) and 270  $\mu\text{L}$  of toluene were added. The solution was transferred to a screw capped NMR tube and cooled to  $-78\text{ }^\circ\text{C}$ . Then, a solution of 20  $\mu\text{L}$  of  $\text{PhI}$  and 180  $\mu\text{L}$  of toluene was added by syringe. The sample was introduced into the NMR spectrometer probe that was pre-cooled to  $-80\text{ }^\circ\text{C}$ , and the decay of the Pd complex was measured by  $^{31}\text{P}$  NMR spectroscopy with the aid of an automated acquisition program.

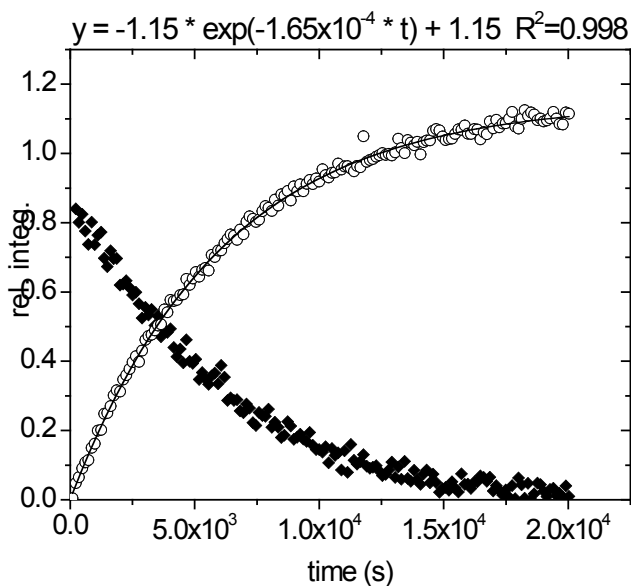

**Figure S4.** Representative decay of  $\text{Pd}(\text{PCy}_3)_2$  (**4**) (0.019 M) in the presence of  $\text{PCy}_3$  (0.009 M) and  $\text{PhCl}$  (2.0 M) in toluene at  $70\text{ }^\circ\text{C}$ .

**Representative procedure for the oxidative addition of  $\text{PhCl}$  to  $\text{Pd}(\text{PCy}_3)_2$  (**4**).** Into a small vial was weighed 14.1 mg of  $\text{PCy}_3$  (0.0503 mmol). This material was dissolved in 500  $\mu\text{L}$  of toluene to prepare a 0.100 M stock solution. Into a separate vial, 6.3 mg (0.0094 mmol) of the palladium complex  $\text{Pd}(\text{PCy}_3)_2$  (**4**) were weighed. To this vial 50  $\mu\text{L}$

of the phosphine stock solution (0.0050 mmol), 40  $\mu\text{L}$  of PhCl and 410  $\mu\text{L}$  of toluene were added to make the final volume 500  $\mu\text{L}$ . The solution was transferred to a screw capped NMR tube, and the sample was placed into a preheated NMR spectrometer probe at 70°C. The decay of the Pd complex was measured by  $^{31}\text{P}$  NMR spectroscopy with the aid of an automated acquisition program.

**Representative procedure for the oxidative addition of PhBr to Pd(PCy<sub>3</sub>)<sub>2</sub> (4).** The phosphine PCy<sub>3</sub> (25.0 mg, 0.089 mmol) and the palladium complex Pd(PCy<sub>3</sub>)<sub>2</sub> (4) (6.3 mg, 0.0094 mmol) were weighed into a small vial. To this vial was added 400  $\mu\text{L}$  of toluene, and the resulting solution was transferred to a screw-capped NMR tube. The sample was cooled in ice bath, and 100  $\mu\text{L}$  of PhBr were added to the tube with a syringe. The sample was introduced into the NMR spectrometer probe pre-cooled at 10 °C. The decay of the Pd complex was measured by  $^{31}\text{P}$  NMR spectroscopy with the aid of an automated acquisition program.

## DERIVATION OF RATE EXPRESSIONS

### Derivation of the rate expressions. Scheme 4.

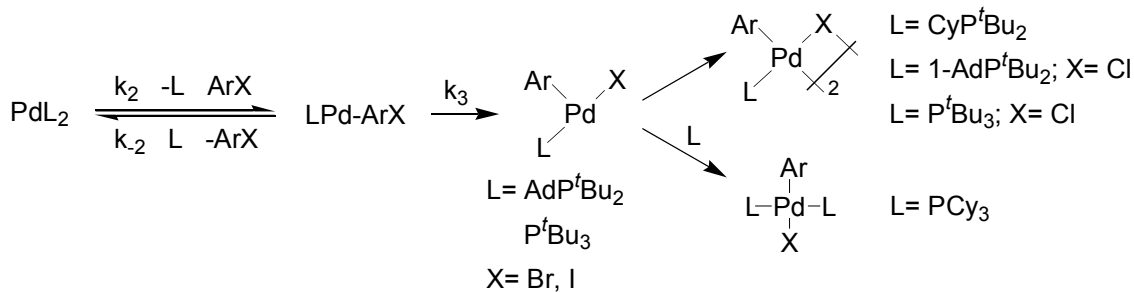

$$\text{rate} = [\text{PdL}_2]k_{\text{obs}} \quad \frac{1}{k_{\text{obs}}} = \frac{1}{k_2[\text{ArX}]} + \frac{[\text{L}]}{K_2 k_3 [\text{ArX}]}$$

If  $k_3 \gg k_{-2}[\text{L}]$

$$k_{\text{obs}} = \frac{k_2 k_3 [\text{ArX}]}{k_3 + k_{-2}[\text{L}]} \quad \frac{1}{k_{\text{obs}}} = \left( \frac{1}{k_2} + \frac{[\text{L}]}{K_2 k_3} \right) \frac{1}{[\text{ArX}]}$$

$k_{\text{obs}} = k_2[\text{ArX}]$

Under the steady state approximation,

$$\frac{d[\text{LPd}(\text{ArX})]}{dt} = 0 = k_2[\text{PdL}_2][\text{ArX}] - k_{-2}[\text{LPd}(\text{ArX})][\text{L}] - k_3[\text{LPd}(\text{ArX})]$$

Solving for [LPd(ArX)],

$$[\text{LPd}(\text{ArX})] = \frac{k_2[\text{ArX}][\text{PdL}_2]}{k_3 + k_{-2}[\text{L}]}$$

$$\text{rate} = k_3[\text{LPd}(\text{ArX})] = \frac{k_2 k_3 [\text{ArX}][\text{PdL}_2]}{k_3 + k_{-2}[\text{L}]}$$

$\text{rate} = k_{\text{obs}}[\text{PdL}_2]$ ; therefore,

$$k_{\text{obs}} = \frac{k_2 k_3 [\text{ArX}]}{k_3 + k_{-2}[\text{L}]}$$

If  $k_3 \gg k_{-2}[L]$ ; the term  $k_{-2}[L]$  in  $k_{obs}$  denominator can be ignored and the expression for  $k_{obs}$  gets reduced to  $k_{obs} = k_2[ArX]$ .

### Derivation of the rate expressions. Scheme 5.

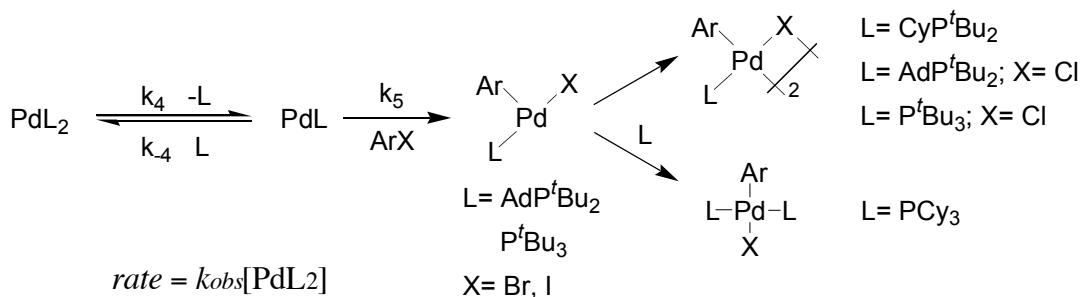

$$k_{obs} = \frac{k_4 k_5 [ArX]}{k_5 [ArX] + k_{-4} [L]} \quad 1/k_{obs} = \frac{1}{k_4} + \frac{[L]}{K_4 k_5 [ArX]} \quad \text{If } k_5 [ArX] \gg k_{-4} [L]$$

$$k_{obs} = k_4$$

Under the steady state approximation,

$$\frac{d[PdL]}{dt} = 0 = k_4 [PdL_2] - k_{-4} [PdL][L] - k_5 [PdL][ArX]$$

Solving for  $[PdL]$ ,

$$[PdL] = \frac{k_4 [PdL_2]}{k_{-4} [L] + k_5 [ArX]}$$

$$rate = k_5 [PdL][ArX] = \frac{k_4 k_5 [PdL_2][ArX]}{k_{-4} [L] + k_5 [ArX]}$$

$rate = k_{obs}[PdL_2]$ ; therefore,

$$k_{obs} = \frac{k_4 k_5 [ArX]}{k_{-4} [L] + k_5 [ArX]}$$

If  $k_5 [ArX] \gg k_{-4} [L]$

The term  $k_4[L]$  in  $k_{obs}$  denominator can be ignored and the expression for  $k_{obs}$  gets reduced to  $k_{obs} = k_4$ .

### Derivation of the rate expressions. Scheme 7.

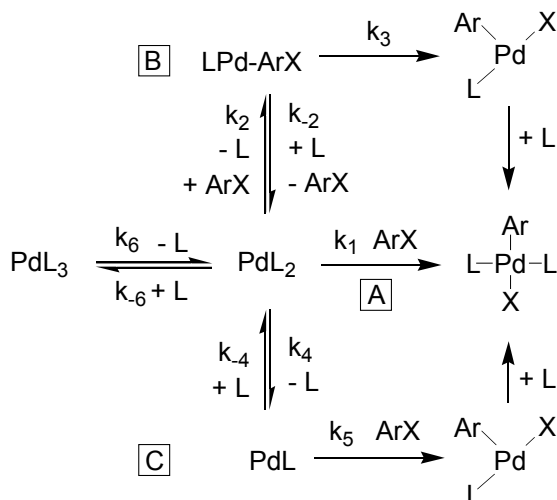

$$rate = [PdL_3]k_{obs}$$

#### A. Direct reaction to $L_2Pd$

$$k_{obs} = \frac{k_6 k_1 [ArX]}{k_1 [ArX] + k_6 [L]}$$

$$1/k_{obs} = \frac{1}{k_6} + \frac{[L]}{K_6 k_1 [ArX]}$$

#### B. Associative displacement of the ligand in $L_2Pd$

$$k_{obs} = \frac{k_6 k_2 k_3 [ArX]}{k_2 k_3 [ArX] + k_3 k_6 [L] + k_2 k_6 [L]^2}$$

$$1/k_{obs} = \frac{1}{k_6} + \frac{[L]}{K_6 k_2 [ArX]} + \frac{[L]^2}{K_6 K_2 k_3 [ArX]}$$

#### C. Dissociation of ligand from $L_2Pd$

$$k_{obs} = \frac{k_6 k_4 k_5 [ArX]}{k_4 k_5 [ArX] + k_5 k_6 [ArX][L] + k_4 k_6 [L]^2}$$

$$1/k_{obs} = \frac{1}{k_6} + \frac{[L]}{K_6 k_4} + \frac{[L]^2}{K_6 K_4 k_5 [ArX]}$$



## Path A

Under the steady state approximation,

$$\frac{d[\text{PdL}_2]}{dt} = 0 = k_6[\text{PdL}_3] - k_{-6}[\text{PdL}_2][\text{L}] - k_1[\text{PdL}_2][\text{ArX}]$$

Solving for  $[\text{PdL}_2]$ ,

$$[\text{PdL}_2] = \frac{k_6[\text{PdL}_3]}{k_{-6}[\text{L}] + k_1[\text{ArX}]}$$

$$\text{rate} = k_1[\text{PdL}_2][\text{ArX}] = \frac{k_6 k_1 [\text{PdL}_3][\text{ArX}]}{k_{-6}[\text{L}] + k_1[\text{ArX}]}$$

$\text{rate} = k_{obs}[\text{PdL}_3]$ ; therefore,

$$k_{obs} = \frac{k_6 k_1 [\text{ArX}]}{k_{-6}[\text{L}] + k_1[\text{ArX}]}$$

## Path B

Under the steady state approximation,

$$\frac{d[\text{LPd}(\text{ArX})]}{dt} = 0 = k_2[\text{PdL}_2][\text{ArX}] - k_{-2}[\text{LPd}(\text{ArX})][\text{L}] - k_3[\text{LPd}(\text{ArX})] \quad (1)$$

$$\frac{d[\text{PdL}_2]}{dt} = 0 = k_6[\text{PdL}_3] + k_{-2}[\text{LPd}(\text{ArX})][\text{L}] - k_{-6}[\text{PdL}_2][\text{L}] - k_2[\text{PdL}_2][\text{ArX}] \quad (2)$$

Solving for  $[\text{LPd}(\text{ArX})]$ ,

$$[\text{LPd}(\text{ArX})] = \frac{k_2[\text{PdL}_2][\text{ArX}]}{k_{-2}[\text{L}] + k_3} \quad (3)$$

Adding equations (1) and (2),

$$0 = k_6[\text{PdL}_3] - k_{-6}[\text{PdL}_2][\text{L}] - k_3[\text{LPd}(\text{ArX})]$$

Solving for  $[\text{PdL}_2]$ ,

$$[\text{PdL}_2] = \frac{k_6[\text{PdL}_3] - k_3[\text{LPd}(\text{ArX})]}{k_{-6}[\text{L}]}$$

Substituting  $[\text{PdL}_2]$  into (3),

$$[\text{LPd}(\text{ArX})] = \frac{k_6 k_2 [\text{PdL}_3][\text{ArX}] - k_2 k_3 [\text{LPd}(\text{ArX})][\text{ArX}]}{k_{-6} k_{-2} [\text{L}]^2 + k_{-6} k_3 [\text{L}]}$$

Solving for  $[\text{LPd}(\text{ArX})]$ ,

$$[\text{LPd}(\text{ArX})] = \frac{k_6 k_2 [\text{PdL}_3][\text{ArX}]}{k_{-6} k_{-2} [\text{L}]^2 + k_{-6} k_3 [\text{L}] + k_2 k_3 [\text{ArX}]}$$

$$\text{rate} = k_6 [\text{LPd}(\text{ArX})] = \frac{k_6 k_2 k_3 [\text{PdL}_3][\text{ArX}]}{k_{-6} k_{-2} [\text{L}]^2 + k_{-6} k_3 [\text{L}] + k_2 k_3 [\text{ArX}]} = k_{\text{obs}} [\text{PdL}_3]$$

Therefore,

$$k_{\text{obs}} = \frac{k_6 k_2 k_3 [\text{ArX}]}{k_{-6} k_{-2} [\text{L}]^2 + k_{-6} k_3 [\text{L}] + k_2 k_3 [\text{ArX}]}$$

### Path C

Under the steady state approximation,

$$\frac{d[\text{PdL}]}{dt} = 0 = k_4[\text{PdL}_2] - k_{-4}[\text{PdL}][\text{L}] - k_5[\text{PdL}][\text{ArX}] \quad (4)$$

$$\frac{d[\text{PdL}_2]}{dt} = 0 = k_6[\text{PdL}_3] + k_{-4}[\text{PdL}][\text{L}] - k_{-6}[\text{PdL}_2][\text{L}] - k_4[\text{PdL}_2] \quad (5)$$

Solving for  $[\text{PdL}]$ ,

$$[\text{PdL}] = \frac{k_4[\text{PdL}_2]}{k_{-4}[\text{L}] + k_5[\text{ArX}]} \quad (6)$$

Adding equations (4) and (5),

$$0 = k_6[\text{PdL}_3] - k_{-6}[\text{PdL}_2][\text{L}] - k_5[\text{PdL}][\text{ArX}]$$

Solving for  $[\text{PdL}_2]$ ,

$$[\text{PdL}_2] = \frac{k_6[\text{PdL}_3] - k_5[\text{ArX}][\text{PdL}]}{k_{-6}[\text{L}]}$$

Substituting  $[\text{PdL}_2]$  into (3),

$$[\text{PdL}] = \frac{k_6k_4[\text{PdL}_3] - k_4k_5[\text{ArX}][\text{PdL}]}{k_{-6}k_{-4}[\text{L}]^2 + k_{-6}k_5[\text{ArX}][\text{L}]}$$

Solving for  $[\text{PdL}]$ ,

$$[\text{PdL}] = \frac{k_6k_4[\text{PdL}_3]}{k_{-6}k_{-4}[\text{L}]^2 + k_{-6}k_5[\text{ArX}][\text{L}] + k_4k_5[\text{ArX}]}$$

$$rate = k_5[\text{PdL}][\text{ArX}] = \frac{k_6k_4k_5[\text{PdL}_3][\text{ArX}]}{k_{-6}k_{-4}[\text{L}]^2 + k_{-6}k_5[\text{ArX}][\text{L}] + k_4k_5[\text{ArX}]} = k_{obs}[\text{PdL}_3]$$

Therefore,

$$k_{obs} = \frac{k_6k_4k_5[\text{ArX}]}{k_{-6}k_{-4}[\text{L}]^2 + k_{-6}k_5[\text{ArX}][\text{L}] + k_4k_5[\text{ArX}]}$$

## X ray crystallographic data for [(P<sup>t</sup>Bu<sub>3</sub>)Pd(2-CF<sub>3</sub>C<sub>6</sub>H<sub>4</sub>)(Cl)]<sub>2</sub> (10)

### Data Collection

A pale yellow plate crystal of C<sub>38</sub>H<sub>62</sub>Cl<sub>2</sub>F<sub>6</sub>P<sub>2</sub>Pd<sub>2</sub> having approximate dimensions of 0.20 x 0.20 x 0.08 mm<sup>3</sup> was mounted with epoxy cement on the tip of a fine glass fiber. All measurements were made on a Nonius KappaCCD diffractometer with graphite monochromated Mo-K $\alpha$  radiation.

Cell constants and an orientation matrix for data collection corresponded to a primitive monoclinic cell with dimensions:

$$\begin{aligned}a &= 8.2900(17) \text{ \AA} & \alpha &= 90^\circ \\b &= 24.948(5) \text{ \AA} & \beta &= 106.86(3)^\circ \\c &= 10.626(2) \text{ \AA} & \gamma &= 90^\circ \\V &= 2103.2(7) \text{ \AA}^3\end{aligned}$$

For  $Z = 2$  and F.W. = 978.52, the calculated density is 1.545 g/cm<sup>3</sup>. Based on a statistical analysis of intensity distribution, and the successful solution and refinement of the structure, the space group was determined to be  $P2_1$  (#4).

The data were collected at a temperature of 173(2) K to a maximum  $2\theta$  value of 56.52°. Four omega scans consisting of 108, 85, 101, and 42 data frames, respectively, were collected with a frame width of 0.7° and a detector-to-crystal distance,  $D_x$ , of 35.0 mm. Each frame was exposed twice (for the purpose of de-zinging) for a total of 84 s. The data frames were processed and scaled using the DENZO software package.<sup>1</sup>

### Data Reduction

A total of 8016 reflections were collected of which 8016 were unique and observed ( $R_{\text{int}} = 0.000$ , Friedel pairs not merged). The linear absorption coefficient,  $\mu$ , for Mo-K $\alpha$  radiation is  $11.11 \text{ cm}^{-1}$ , and no absorption correction was applied. The data were corrected for Lorentz and polarization effects.

### Structure Solution and Refinement

The structure was solved by direct methods and expanded using Fourier techniques<sup>2</sup>. The non-hydrogen atoms were refined anisotropically, and hydrogen atoms were treated as idealized contributions. The final cycle of full-matrix least-squares refinement<sup>3</sup> on F was based on 8016 observed reflections ( $I > 2.00\sigma(I)$ ) and 559 variable parameters and converged with unweighted and weighted agreement factors of:

$$R = \Sigma ||F_o| - |F_c|| / \Sigma |F_o| = 0.0427$$

$$R_w = \{\Sigma[w (F_o^2 - F_c^2)^2] / \Sigma[w(F_o^2)^2]\}^{1/2} = 0.1089$$

The maximum and minimum peaks on the final difference Fourier map corresponded to 1.301 and  $-0.838 \text{ e}^-/\text{\AA}^3$  respectively.

### Structural Description

The compound crystallized in the chiral monoclinic space group  $P2_1$  with one molecule in the asymmetric unit and two molecules in the unit cell. Pd(1) and Pd(2) are separated by  $3.61 \text{ \AA}$  and bridged by two  $\mu_2$ -chloride ligands. The chloride ligands bond nearly symmetrically with the Pd-Cl bond distances ranging from  $2.3913(16)$  to  $2.4817(17) \text{ \AA}$ .

The mean deviations of the palladium coordination planes are 0.04 Å for Pd(1) and 0.11 Å for Pd(2) and these planes intersect at an angle of 145.6 ° as illustrated in Figure 1.

The molecule possesses a pseudo-center of inversion but the molecular symmetry is disrupted by severe disorder. Although the environment about Pd(1) is well-ordered, the phosphine and aryl groups bonded to Pd(2) are disordered over several positions. Two of the *tert*-butyl groups, C(20-23) and C(24-27), were refined with alternate positions at occupancy factor ratios of 50:50. All components were refined with anisotropic displacement parameters. As illustrated in Figure 2 the alternate location of the aryl group is offset from the primary component by 180 °. The occupancy factor for this group was refined to 70:30 and the minor component was refined with isotropic displacement parameters.

The molecule was refined as a racemic twin and thus the absolute configuration could not be unambiguously determined. There are no significant intermolecular contacts.

## X ray crystallographic data for [(P<sup>t</sup>Bu<sub>3</sub>)Pd(2-CF<sub>3</sub>C<sub>6</sub>H<sub>4</sub>)(Cl)]<sub>2</sub> (10)

### Data Collection

A pale yellow plate crystal of C<sub>38</sub>H<sub>62</sub>Cl<sub>2</sub>F<sub>6</sub>P<sub>2</sub>Pd<sub>2</sub> having approximate dimensions of 0.20 x 0.20 x 0.08 mm<sup>3</sup> was mounted with epoxy cement on the tip of a fine glass fiber. All measurements were made on a Nonius KappaCCD diffractometer with graphite monochromated Mo-K $\alpha$  radiation.

Cell constants and an orientation matrix for data collection corresponded to a primitive monoclinic cell with dimensions:

$$\begin{aligned} a &= 8.2900(17) \text{ \AA} & \alpha &= 90^\circ \\ b &= 24.948(5) \text{ \AA} & \beta &= 106.86(3)^\circ \\ c &= 10.626(2) \text{ \AA} & \gamma &= 90^\circ \\ V &= 2103.2(7) \text{ \AA}^3 \end{aligned}$$

For  $Z = 2$  and F.W. = 978.52, the calculated density is 1.545 g/cm<sup>3</sup>. Based on a statistical analysis of intensity distribution, and the successful solution and refinement of the structure, the space group was determined to be  $P2_1$  (#4).

The data were collected at a temperature of 173(2) K to a maximum  $2\theta$  value of 56.52°. Four omega scans consisting of 108, 85, 101, and 42 data frames, respectively, were collected with a frame width of 0.7° and a detector-to-crystal distance,  $D_x$ , of 35.0 mm. Each frame was exposed twice (for the purpose of de-zinging) for a total of 84 s. The data frames were processed and scaled using the DENZO software package.<sup>3</sup>

### Data Reduction

A total of 8016 reflections were collected of which 8016 were unique and observed ( $R_{\text{int}} = 0.000$ , Friedel pairs not merged). The linear absorption coefficient,  $\mu$ , for Mo-K $\alpha$  radiation is  $11.11 \text{ cm}^{-1}$ , and no absorption correction was applied. The data were corrected for Lorentz and polarization effects.

### Structure Solution and Refinement

The structure was solved by direct methods and expanded using Fourier techniques<sup>4</sup>. The non-hydrogen atoms were refined anisotropically, and hydrogen atoms were treated as idealized contributions. The final cycle of full-matrix least-squares refinement<sup>5</sup> on F was based on 8016 observed reflections ( $I > 2.00\sigma(I)$ ) and 559 variable parameters and converged with unweighted and weighted agreement factors of:

$$R = \Sigma ||F_o| - |F_c|| / \Sigma |F_o| = 0.0427$$

$$R_w = \{\Sigma[w (F_o^2 - F_c^2)^2] / \Sigma[w(F_o^2)^2]\}^{1/2} = 0.1089$$

The maximum and minimum peaks on the final difference Fourier map corresponded to 1.301 and  $-0.838 \text{ e}^-/\text{\AA}^3$  respectively.

### Structural Description

The compound crystallized in the chiral monoclinic space group  $P2_1$  with one molecule in the asymmetric unit and two molecules in the unit cell. Pd(1) and Pd(2) are separated by  $3.61 \text{ \AA}$  and bridged by two  $\mu_2$ -chloride ligands. The chloride ligands bond nearly symmetrically with the Pd-Cl bond distances ranging from  $2.3913(16)$  to  $2.4817(17) \text{ \AA}$ .



The mean deviations of the palladium coordination planes are 0.04 Å for Pd(1) and 0.11 Å for Pd(2) and these planes intersect at an angle of 145.6 ° as illustrated in Figure 1.

The molecule possesses a pseudo-center of inversion but the molecular symmetry is disrupted by severe disorder. Although the environment about Pd(1) is well-ordered, the phosphine and aryl groups bonded to Pd(2) are disordered over several positions. Two of the *tert*-butyl groups, C(20-23) and C(24-27), were refined with alternate positions at occupancy factor ratios of 50:50. All components were refined with anisotropic displacement parameters. As illustrated in Figure 2 the alternate location of the aryl group is offset from the primary component by 180 °. The occupancy factor for this group was refined to 70:30 and the minor component was refined with isotropic displacement parameters.

The molecule was refined as a racemic twin and thus the absolute configuration could not be unambiguously determined. There are no significant intermolecular contacts.

**Figure S5**

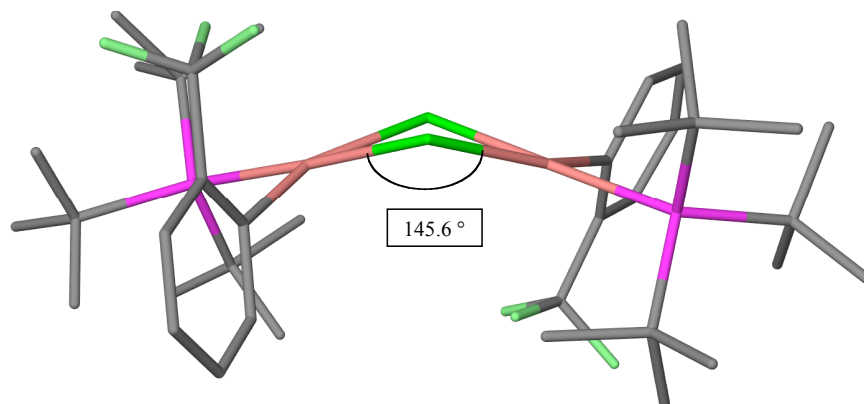

**Figure S6**

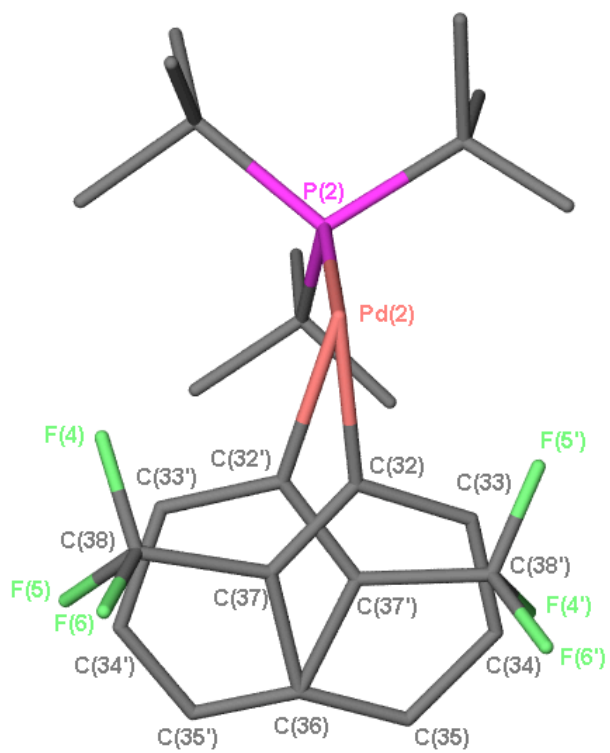

**Table S1.** Crystal data and structure refinement for [(P<sup>t</sup>Bu<sub>3</sub>)Pd(2-CF<sub>3</sub>C<sub>6</sub>H<sub>4</sub>)(Cl)]<sub>2</sub> (**10**)

|                                   |                                                                                               |                 |
|-----------------------------------|-----------------------------------------------------------------------------------------------|-----------------|
| Empirical formula                 | C <sub>38</sub> H <sub>62</sub> Cl <sub>2</sub> F <sub>6</sub> P <sub>2</sub> Pd <sub>2</sub> |                 |
| Formula weight                    | 978.52                                                                                        |                 |
| Temperature                       | 173(2) K                                                                                      |                 |
| Wavelength                        | 0.71073 Å                                                                                     |                 |
| Crystal system                    | Monoclinic                                                                                    |                 |
| Space group                       | P2(1)                                                                                         |                 |
| Unit cell dimensions              | a = 8.2900(17) Å                                                                              | ∠ = 90°.        |
|                                   | b = 24.948(5) Å                                                                               | ∠ = 106.86(3)°. |
|                                   | c = 10.626(2) Å                                                                               | ∠ = 90°.        |
| Volume                            | 2103.2(7) Å <sup>3</sup>                                                                      |                 |
| Z                                 | 2                                                                                             |                 |
| Density (calculated)              | 1.545 g/cm <sup>3</sup>                                                                       |                 |
| Absorption coefficient            | 11.11 cm <sup>-1</sup>                                                                        |                 |
| F(000)                            | 1000                                                                                          |                 |
| Crystal size                      | 0.20 x 0.20 x 0.08 mm <sup>3</sup>                                                            |                 |
| Theta range for data collection   | 2.57 to 28.26°.                                                                               |                 |
| Index ranges                      | -11 ≤ h ≤ 11, -33 ≤ k ≤ 23, -14 ≤ l ≤ 14                                                      |                 |
| Reflections collected             | 8016                                                                                          |                 |
| Independent reflections           | 8016 [R(int) = 0.0000]                                                                        |                 |
| Completeness to theta = 28.26°    | 99.2 %                                                                                        |                 |
| Absorption correction             | None                                                                                          |                 |
| Max. and min. transmission        | 0.9164 and 0.8084                                                                             |                 |
| Refinement method                 | Full-matrix least-squares on F <sup>2</sup>                                                   |                 |
| Data / restraints / parameters    | 8016 / 1 / 559                                                                                |                 |
| Goodness-of-fit on F <sup>2</sup> | 1.015                                                                                         |                 |
| Final R indices [I > 2σ(I)]       | R1 = 0.0427, wR2 = 0.1089                                                                     |                 |
| R indices (all data)              | R1 = 0.0514, wR2 = 0.1146                                                                     |                 |
| Absolute structure parameter      | 0.17(3)                                                                                       |                 |
| Largest diff. peak and hole       | 1.301 and -0.838 e.Å <sup>-3</sup>                                                            |                 |

**Table S2.** Atomic coordinates (  $\times 10^4$ ) and equivalent isotropic displacement parameters ( $\text{\AA}^2 \times 10^3$ ) for  $[(P^tBu_3)Pd(2-CF_3C_6H_4)(Cl)]_2$  (**10**).  $U(eq)$  is defined as one third of the trace of the orthogonalized  $U_{ij}$  tensor.

|       | x         | y        | z         | U(eq)   |
|-------|-----------|----------|-----------|---------|
| Pd(1) | 8676(1)   | 3424(1)  | 7418(1)   | 34(1)   |
| Pd(2) | 6889(1)   | 2167(1)  | 8043(1)   | 34(1)   |
| P(1)  | 8705(2)   | 3967(1)  | 5601(1)   | 32(1)   |
| P(2)  | 5695(2)   | 1789(1)  | 9609(2)   | 37(1)   |
| Cl(2) | 8147(2)   | 2513(1)  | 6442(2)   | 49(1)   |
| Cl(1) | 8672(2)   | 2899(1)  | 9300(2)   | 50(1)   |
| F(1)  | 5627(5)   | 4686(2)  | 8326(6)   | 81(1)   |
| F(2)  | 5733(6)   | 4126(3)  | 9872(5)   | 82(2)   |
| F(3)  | 5743(4)   | 3851(2)  | 7980(4)   | 59(1)   |
| C(1)  | 10203(6)  | 3610(3)  | 4771(6)   | 41(1)   |
| C(2)  | 10712(8)  | 3965(3)  | 3724(7)   | 51(2)   |
| C(3)  | 9451(8)   | 3102(3)  | 4075(7)   | 51(2)   |
| C(4)  | 11777(7)  | 3460(3)  | 5894(6)   | 49(2)   |
| C(5)  | 6488(6)   | 3968(3)  | 4385(6)   | 41(1)   |
| C(6)  | 6386(8)   | 4090(3)  | 2955(7)   | 53(2)   |
| C(7)  | 5686(6)   | 3418(3)  | 4459(7)   | 52(2)   |
| C(8)  | 5367(7)   | 4375(3)  | 4827(7)   | 51(2)   |
| C(9)  | 9430(8)   | 4709(3)  | 5852(7)   | 45(1)   |
| C(10) | 8931(9)   | 5035(3)  | 4580(8)   | 57(2)   |
| C(11) | 8651(9)   | 4993(3)  | 6826(7)   | 50(2)   |
| C(12) | 11352(8)  | 4741(3)  | 6505(7)   | 57(2)   |
| C(13) | 9295(7)   | 4007(2)  | 8740(6)   | 36(1)   |
| C(14) | 11062(7)  | 4090(3)  | 9296(7)   | 44(1)   |
| C(15) | 11692(9)  | 4441(3)  | 10334(7)  | 55(2)   |
| C(16) | 10605(10) | 4714(3)  | 10880(7)  | 59(2)   |
| C(17) | 8897(9)   | 4615(3)  | 10382(6)  | 49(2)   |
| C(18) | 8244(8)   | 4271(3)  | 9333(6)   | 41(1)   |
| C(19) | 6369(8)   | 4231(3)  | 8863(7)   | 47(2)   |
| C(20) | 7540(9)   | 1576(3)  | 11071(7)  | 57(2)   |
| C(21) | 7440(40)  | 1450(20) | 12370(40) | 121(16) |
| C(22) | 8110(30)  | 981(7)   | 10686(18) | 73(5)   |

|        |          |          |           |         |
|--------|----------|----------|-----------|---------|
| C(23)  | 9037(18) | 1910(8)  | 11252(16) | 65(4)   |
| C(21') | 6970(30) | 1345(14) | 12220(30) | 75(8)   |
| C(22') | 8912(17) | 1363(9)  | 10602(15) | 67(4)   |
| C(23') | 8340(20) | 2135(8)  | 11863(16) | 72(4)   |
| C(24)  | 4450(9)  | 2347(3)  | 10164(8)  | 56(2)   |
| C(25)  | 3591(17) | 2689(6)  | 9007(15)  | 53(3)   |
| C(26)  | 3380(20) | 2199(10) | 11030(20) | 50(5)   |
| C(27)  | 5826(17) | 2748(6)  | 11098(15) | 47(3)   |
| C(25') | 2600(20) | 2346(7)  | 9010(20)  | 72(5)   |
| C(26') | 4070(30) | 2256(11) | 11460(30) | 72(7)   |
| C(27') | 5110(30) | 2848(7)  | 10000(30) | 88(6)   |
| C(28)  | 4208(12) | 1177(4)  | 9166(8)   | 69(2)   |
| C(29)  | 3541(14) | 984(4)   | 10269(10) | 86(3)   |
| C(30)  | 2740(20) | 1286(8)  | 8033(15)  | 205(12) |
| C(31)  | 5120(30) | 718(5)   | 8700(20)  | 184(11) |
| C(36)  | 4782(10) | 1150(3)  | 4649(7)   | 53(2)   |
| C(32)  | 5427(10) | 1775(3)  | 6507(8)   | 35(2)   |
| C(33)  | 3878(15) | 2008(6)  | 5882(15)  | 60(3)   |
| C(34)  | 2857(18) | 1821(6)  | 4720(13)  | 67(3)   |
| C(35)  | 3334(16) | 1378(5)  | 4093(11)  | 69(3)   |
| C(37)  | 5872(12) | 1349(4)  | 5871(9)   | 43(2)   |
| C(38)  | 7578(15) | 1063(5)  | 6379(12)  | 55(3)   |
| F(4)   | 8431(8)  | 1159(3)  | 7603(6)   | 70(2)   |
| F(5)   | 7409(12) | 537(3)   | 6287(10)  | 86(2)   |
| F(6)   | 8597(10) | 1179(3)  | 5626(8)   | 83(2)   |
| C(32') | 6210(20) | 1559(8)  | 6737(19)  | 29(3)   |
| C(33') | 7210(30) | 1112(8)  | 6840(20)  | 33(4)   |
| C(34') | 6990(40) | 742(15)  | 5790(30)  | 58(7)   |
| C(35') | 5720(30) | 766(10)  | 4750(30)  | 52(5)   |
| C(37') | 4880(20) | 1578(8)  | 5583(18)  | 30(3)   |
| C(38') | 3640(40) | 2029(11) | 5220(30)  | 44(6)   |
| F(4')  | 2071(19) | 1826(8)  | 4940(20)  | 80(6)   |
| F(5')  | 3742(17) | 2385(7)  | 6145(14)  | 61(4)   |
| F(6')  | 3670(20) | 2297(6)  | 4169(14)  | 63(4)   |

---

**Table S3.** Bond lengths [ $\text{\AA}$ ] and angles [ $^\circ$ ] for  $[(P^t\text{Bu}_3)\text{Pd}(2\text{-CF}_3\text{C}_6\text{H}_4)(\text{Cl})]_2$  (**10**).

|              |            |               |           |
|--------------|------------|---------------|-----------|
| Pd(1)-C(13)  | 1.984(6)   | C(20)-C(22')  | 1.467(18) |
| Pd(1)-P(1)   | 2.3645(15) | C(20)-C(23)   | 1.461(19) |
| Pd(1)-Cl(1)  | 2.3913(16) | C(20)-C(21')  | 1.54(3)   |
| Pd(1)-Cl(2)  | 2.4814(17) | C(20)-C(22)   | 1.645(18) |
| Pd(2)-C(32)  | 1.985(8)   | C(20)-C(23')  | 1.66(2)   |
| Pd(2)-C(32') | 2.02(2)    | C(24)-C(27')  | 1.40(2)   |
| Pd(2)-P(2)   | 2.3650(15) | C(24)-C(25)   | 1.496(16) |
| Pd(2)-Cl(2)  | 2.3994(15) | C(24)-C(26)   | 1.50(2)   |
| Pd(2)-Cl(1)  | 2.4817(17) | C(24)-C(26')  | 1.52(3)   |
| P(1)-C(5)    | 1.916(6)   | C(24)-C(27)   | 1.622(15) |
| P(1)-C(1)    | 1.937(5)   | C(24)-C(25')  | 1.67(2)   |
| P(1)-C(9)    | 1.940(7)   | C(28)-C(30)   | 1.466(17) |
| P(2)-C(20)   | 1.913(7)   | C(28)-C(29)   | 1.512(11) |
| P(2)-C(24)   | 1.923(7)   | C(28)-C(31)   | 1.531(16) |
| P(2)-C(28)   | 1.933(7)   | C(36)-C(35')  | 1.22(3)   |
| F(1)-C(19)   | 1.338(8)   | C(36)-C(35)   | 1.305(15) |
| F(2)-C(19)   | 1.350(8)   | C(36)-C(37')  | 1.44(2)   |
| F(3)-C(19)   | 1.328(8)   | C(36)-C(37)   | 1.437(12) |
| C(1)-C(3)    | 1.508(10)  | C(32)-C(33)   | 1.391(15) |
| C(1)-C(4)    | 1.537(8)   | C(32)-C(37)   | 1.368(13) |
| C(1)-C(2)    | 1.573(8)   | C(33)-C(34)   | 1.361(19) |
| C(5)-C(6)    | 1.527(9)   | C(34)-C(35)   | 1.41(2)   |
| C(5)-C(7)    | 1.536(10)  | C(37)-C(38)   | 1.535(16) |
| C(5)-C(8)    | 1.539(9)   | C(38)-F(4)    | 1.310(14) |
| C(9)-C(10)   | 1.529(10)  | C(38)-F(5)    | 1.322(14) |
| C(9)-C(11)   | 1.542(9)   | C(38)-F(6)    | 1.352(14) |
| C(9)-C(12)   | 1.545(9)   | C(32')-C(37') | 1.39(3)   |
| C(13)-C(18)  | 1.382(8)   | C(32')-C(33') | 1.38(3)   |
| C(13)-C(14)  | 1.427(8)   | C(33')-C(34') | 1.42(4)   |
| C(14)-C(15)  | 1.385(10)  | C(34')-C(35') | 1.29(4)   |
| C(15)-C(16)  | 1.384(12)  | C(37')-C(38') | 1.50(3)   |
| C(16)-C(17)  | 1.382(10)  | C(38')-F(4')  | 1.35(3)   |
| C(17)-C(18)  | 1.387(9)   | C(38')-F(6')  | 1.31(3)   |
| C(18)-C(19)  | 1.492(9)   | C(38')-F(5')  | 1.31(3)   |
| C(20)-C(21)  | 1.44(4)    |               |           |

|                    |            |                     |           |
|--------------------|------------|---------------------|-----------|
| C(13)-Pd(1)-P(1)   | 95.52(17)  | C(6)-C(5)-C(8)      | 108.0(5)  |
| C(13)-Pd(1)-Cl(1)  | 82.62(17)  | C(7)-C(5)-C(8)      | 105.3(5)  |
| P(1)-Pd(1)-Cl(1)   | 178.14(6)  | C(6)-C(5)-P(1)      | 115.9(4)  |
| C(13)-Pd(1)-Cl(2)  | 160.88(18) | C(7)-C(5)-P(1)      | 108.0(4)  |
| P(1)-Pd(1)-Cl(2)   | 103.04(5)  | C(8)-C(5)-P(1)      | 109.9(4)  |
| Cl(1)-Pd(1)-Cl(2)  | 78.81(6)   | C(10)-C(9)-C(11)    | 106.8(6)  |
| C(32)-Pd(2)-C(32') | 23.7(5)    | C(10)-C(9)-C(12)    | 110.4(5)  |
| C(32)-Pd(2)-P(2)   | 95.8(2)    | C(11)-C(9)-C(12)    | 104.7(6)  |
| C(32')-Pd(2)-P(2)  | 95.4(5)    | C(10)-C(9)-P(1)     | 113.1(5)  |
| C(32)-Pd(2)-Cl(2)  | 83.2(2)    | C(11)-C(9)-P(1)     | 111.0(4)  |
| C(32')-Pd(2)-Cl(2) | 82.9(5)    | C(12)-C(9)-P(1)     | 110.5(5)  |
| P(2)-Pd(2)-Cl(2)   | 177.57(6)  | C(18)-C(13)-C(14)   | 116.7(6)  |
| C(32)-Pd(2)-Cl(1)  | 158.6(2)   | C(18)-C(13)-Pd(1)   | 127.2(4)  |
| C(32')-Pd(2)-Cl(1) | 157.7(5)   | C(14)-C(13)-Pd(1)   | 115.1(4)  |
| P(2)-Pd(2)-Cl(1)   | 102.69(5)  | C(15)-C(14)-C(13)   | 121.8(6)  |
| Cl(2)-Pd(2)-Cl(1)  | 78.65(6)   | C(14)-C(15)-C(16)   | 120.2(6)  |
| C(5)-P(1)-C(1)     | 108.1(3)   | C(15)-C(16)-C(17)   | 118.1(7)  |
| C(5)-P(1)-C(9)     | 106.9(3)   | C(16)-C(17)-C(18)   | 122.4(7)  |
| C(1)-P(1)-C(9)     | 106.7(3)   | C(13)-C(18)-C(17)   | 120.8(6)  |
| C(5)-P(1)-Pd(1)    | 108.46(19) | C(13)-C(18)-C(19)   | 123.3(6)  |
| C(1)-P(1)-Pd(1)    | 105.53(19) | C(17)-C(18)-C(19)   | 115.9(6)  |
| C(9)-P(1)-Pd(1)    | 120.7(2)   | F(3)-C(19)-F(1)     | 105.5(6)  |
| C(20)-P(2)-C(24)   | 109.0(4)   | F(3)-C(19)-F(2)     | 105.1(5)  |
| C(20)-P(2)-C(28)   | 106.3(4)   | F(1)-C(19)-F(2)     | 105.4(5)  |
| C(24)-P(2)-C(28)   | 106.6(4)   | F(3)-C(19)-C(18)    | 116.1(5)  |
| C(20)-P(2)-Pd(2)   | 106.5(2)   | F(1)-C(19)-C(18)    | 113.0(5)  |
| C(24)-P(2)-Pd(2)   | 107.4(2)   | F(2)-C(19)-C(18)    | 110.9(6)  |
| C(28)-P(2)-Pd(2)   | 120.7(2)   | C(21)-C(20)-C(22')  | 121(2)    |
| Pd(2)-Cl(2)-Pd(1)  | 95.38(5)   | C(21)-C(20)-C(23)   | 106.5(12) |
| Pd(1)-Cl(1)-Pd(2)  | 95.59(6)   | C(22')-C(20)-C(23)  | 62.5(11)  |
| C(3)-C(1)-C(4)     | 108.2(5)   | C(21)-C(20)-C(21')  | 17.1(15)  |
| C(3)-C(1)-C(2)     | 106.6(5)   | C(22')-C(20)-C(21') | 125.3(16) |
| C(4)-C(1)-C(2)     | 110.2(5)   | C(23)-C(20)-C(21')  | 123.6(12) |
| C(3)-C(1)-P(1)     | 112.4(4)   | C(21)-C(20)-C(22)   | 98(2)     |
| C(4)-C(1)-P(1)     | 105.7(4)   | C(22')-C(20)-C(22)  | 44.0(10)  |
| C(2)-C(1)-P(1)     | 113.7(4)   | C(23)-C(20)-C(22)   | 104.6(11) |
| C(6)-C(5)-C(7)     | 109.2(6)   | C(21')-C(20)-C(22)  | 92.1(17)  |

|                     |           |                      |           |
|---------------------|-----------|----------------------|-----------|
| C(21)-C(20)-C(23')  | 80.0(19)  | C(31)-C(28)-P(2)     | 109.4(7)  |
| C(22)-C(20)-C(23')  | 103.9(12) | C(35')-C(36)-C(35)   | 149.5(15) |
| C(23)-C(20)-C(23')  | 41.9(9)   | C(35')-C(36)-C(37')  | 127.8(16) |
| C(21')-C(20)-C(23') | 94.7(15)  | C(35)-C(36)-C(37')   | 81.5(10)  |
| C(22)-C(20)-C(23')  | 141.2(12) | C(35')-C(36)-C(37)   | 88.5(14)  |
| C(21)-C(20)-P(2)    | 125.6(15) | C(35)-C(36)-C(37)    | 120.9(9)  |
| C(22')-C(20)-P(2)   | 109.9(7)  | C(37')-C(36)-C(37)   | 39.5(8)   |
| C(23)-C(20)-P(2)    | 113.4(7)  | C(33)-C(32)-C(37)    | 115.7(10) |
| C(21')-C(20)-P(2)   | 113.0(9)  | C(33)-C(32)-Pd(2)    | 116.5(9)  |
| C(22)-C(20)-P(2)    | 105.6(8)  | C(37)-C(32)-Pd(2)    | 127.0(7)  |
| C(23')-C(20)-P(2)   | 106.5(7)  | C(32)-C(33)-C(34)    | 122.3(14) |
| C(27')-C(24)-C(25)  | 59.8(13)  | C(33)-C(34)-C(35)    | 120.9(13) |
| C(27')-C(24)-C(26)  | 128.3(14) | C(36)-C(35)-C(34)    | 118.4(10) |
| C(25)-C(24)-C(26)   | 114.9(11) | C(32)-C(37)-C(36)    | 121.7(8)  |
| C(27')-C(24)-C(26') | 116.0(15) | C(32)-C(37)-C(38)    | 122.7(9)  |
| C(25)-C(24)-C(26')  | 130.9(13) | C(36)-C(37)-C(38)    | 115.6(8)  |
| C(26)-C(24)-C(26')  | 24.2(9)   | F(4)-C(38)-F(5)      | 105.6(10) |
| C(27')-C(24)-C(27)  | 45.0(12)  | F(4)-C(38)-F(6)      | 107.4(10) |
| C(25)-C(24)-C(27)   | 103.5(9)  | F(5)-C(38)-F(6)      | 103.9(10) |
| C(26)-C(24)-C(27)   | 102.2(10) | F(4)-C(38)-C(37)     | 116.2(10) |
| C(26')-C(24)-C(27)  | 80.3(11)  | F(5)-C(38)-C(37)     | 111.6(10) |
| C(27')-C(24)-C(25') | 102.6(13) | F(6)-C(38)-C(37)     | 111.3(9)  |
| C(25)-C(24)-C(25')  | 43.7(9)   | C(37')-C(32')-C(33') | 113.7(19) |
| C(26)-C(24)-C(25')  | 82.6(10)  | C(37')-C(32')-Pd(2)  | 124.9(16) |
| C(26')-C(24)-C(25') | 106.2(13) | C(33')-C(32')-Pd(2)  | 120.8(15) |
| C(27)-C(24)-C(25')  | 141.8(10) | C(34')-C(33')-C(32') | 122(2)    |
| C(27')-C(24)-P(2)   | 110.2(9)  | C(33')-C(34')-C(35') | 122(3)    |
| C(25)-C(24)-P(2)    | 109.3(6)  | C(36)-C(35')-C(34')  | 117(3)    |
| C(26)-C(24)-P(2)    | 118.4(11) | C(32')-C(37')-C(36)  | 117.0(16) |
| C(26')-C(24)-P(2)   | 116.3(11) | C(32')-C(37')-C(38') | 124(2)    |
| C(27)-C(24)-P(2)    | 106.8(6)  | C(36)-C(37')-C(38')  | 118.6(19) |
| C(25')-C(24)-P(2)   | 103.6(7)  | F(4')-C(38')-F(6')   | 105(3)    |
| C(30)-C(28)-C(29)   | 107.1(10) | F(4')-C(38')-F(5')   | 106(2)    |
| C(30)-C(28)-C(31)   | 103.9(13) | F(6')-C(38')-F(5')   | 106(2)    |
| C(29)-C(28)-C(31)   | 109.7(10) | F(4')-C(38')-C(37')  | 109(2)    |
| C(30)-C(28)-P(2)    | 111.8(8)  | F(6')-C(38')-C(37')  | 115.0(19) |
| C(29)-C(28)-P(2)    | 114.4(5)  | F(5')-C(38')-C(37')  | 115(3)    |



**Table S4.** Anisotropic displacement parameters ( $\text{\AA}^2 \times 10^3$ ) for  $[(P^t\text{Bu}_3)\text{Pd}(2\text{-CF}_3\text{C}_6\text{H}_4)(\text{Cl})_2]$  (**10**). The anisotropic displacement factor exponent takes the form:  $-2h^2 a^* U^{11} + \dots + 2hk a^* b^* U^{12}$

|       | U <sup>11</sup> | U <sup>22</sup> | U <sup>33</sup> | U <sup>23</sup> | U <sup>13</sup> | U <sup>12</sup> |
|-------|-----------------|-----------------|-----------------|-----------------|-----------------|-----------------|
| Pd(1) | 32(1)           | 34(1)           | 35(1)           | 1(1)            | 10(1)           | -8(1)           |
| Pd(2) | 36(1)           | 33(1)           | 32(1)           | 3(1)            | 9(1)            | -4(1)           |
| P(1)  | 25(1)           | 37(1)           | 33(1)           | 1(1)            | 8(1)            | -5(1)           |
| P(2)  | 41(1)           | 35(1)           | 34(1)           | 1(1)            | 11(1)           | -5(1)           |
| Cl(2) | 68(1)           | 40(1)           | 46(1)           | -4(1)           | 29(1)           | -16(1)          |
| Cl(1) | 64(1)           | 46(1)           | 37(1)           | 1(1)            | 12(1)           | -21(1)          |
| F(1)  | 56(2)           | 64(3)           | 113(4)          | 11(3)           | 9(2)            | 13(2)           |
| F(2)  | 61(3)           | 136(5)          | 58(3)           | -6(3)           | 33(2)           | -8(3)           |
| F(3)  | 37(2)           | 75(3)           | 66(3)           | -14(2)          | 18(2)           | -5(2)           |
| C(1)  | 25(2)           | 53(4)           | 48(3)           | 3(3)            | 15(2)           | 0(2)            |
| C(2)  | 39(3)           | 64(4)           | 54(4)           | 12(3)           | 23(3)           | -2(3)           |
| C(3)  | 52(3)           | 54(4)           | 57(4)           | 2(3)            | 30(3)           | 6(3)            |
| C(4)  | 31(2)           | 59(4)           | 57(4)           | 13(4)           | 14(2)           | 7(3)            |
| C(5)  | 24(2)           | 61(4)           | 37(3)           | 2(3)            | 6(2)            | -1(2)           |
| C(6)  | 39(3)           | 71(5)           | 42(4)           | 8(3)            | 1(3)            | 3(3)            |
| C(7)  | 28(2)           | 70(4)           | 51(4)           | -1(4)           | 3(2)            | -16(3)          |
| C(8)  | 29(3)           | 64(4)           | 58(4)           | 10(3)           | 12(3)           | 11(3)           |
| C(9)  | 45(3)           | 39(3)           | 49(4)           | 11(3)           | 13(3)           | -10(3)          |
| C(10) | 59(4)           | 50(4)           | 63(5)           | 15(4)           | 17(3)           | -8(3)           |
| C(11) | 57(3)           | 32(3)           | 62(4)           | 3(3)            | 20(3)           | 2(3)            |
| C(12) | 56(4)           | 50(4)           | 59(4)           | -12(4)          | 5(3)            | -26(3)          |
| C(13) | 38(3)           | 36(3)           | 31(3)           | -2(2)           | 8(2)            | -4(2)           |
| C(14) | 34(3)           | 44(3)           | 46(4)           | 2(3)            | -1(2)           | -6(2)           |
| C(15) | 52(4)           | 52(4)           | 48(4)           | 9(3)            | -5(3)           | -10(3)          |
| C(16) | 75(5)           | 48(4)           | 43(4)           | -2(3)           | 0(3)            | -14(4)          |
| C(17) | 70(4)           | 40(3)           | 35(3)           | 1(3)            | 15(3)           | -7(3)           |
| C(18) | 47(3)           | 39(3)           | 36(3)           | 2(3)            | 10(3)           | -4(2)           |
| C(19) | 52(3)           | 41(4)           | 50(4)           | 1(3)            | 20(3)           | 3(3)            |
| C(20) | 59(4)           | 64(5)           | 45(4)           | 20(4)           | 9(3)            | 15(3)           |
| C(21) | 66(19)          | 230(40)         | 54(14)          | 9(17)           | -1(13)          | -80(20)         |
| C(22) | 98(13)          | 64(11)          | 61(10)          | 29(9)           | 28(9)           | 46(10)          |

|        |         |         |         |         |         |          |
|--------|---------|---------|---------|---------|---------|----------|
| C(23)  | 48(8)   | 91(12)  | 48(9)   | 6(9)    | 1(6)    | 13(7)    |
| C(21') | 37(11)  | 140(20) | 30(10)  | 48(13)  | -13(8)  | -27(12)  |
| C(22') | 42(7)   | 95(13)  | 49(9)   | 26(9)   | -9(6)   | -1(8)    |
| C(23') | 89(11)  | 72(11)  | 45(8)   | 8(9)    | 3(8)    | -5(10)   |
| C(24)  | 62(4)   | 53(4)   | 59(4)   | 3(3)    | 30(4)   | 9(3)     |
| C(25)  | 46(7)   | 53(8)   | 59(9)   | -5(7)   | 14(6)   | 15(6)    |
| C(26)  | 40(8)   | 67(12)  | 46(10)  | -21(9)  | 19(7)   | 5(8)     |
| C(27)  | 55(7)   | 41(7)   | 47(8)   | -20(6)  | 16(6)   | -7(6)    |
| C(25') | 56(8)   | 65(10)  | 99(14)  | 19(9)   | 28(9)   | 27(8)    |
| C(26') | 105(19) | 53(11)  | 73(18)  | -9(12)  | 50(14)  | -5(14)   |
| C(27') | 95(14)  | 52(11)  | 130(20) | 16(12)  | 52(15)  | 8(9)     |
| C(28)  | 98(6)   | 64(5)   | 56(5)   | -23(4)  | 38(4)   | -47(4)   |
| C(29)  | 118(8)  | 74(6)   | 80(6)   | -15(5)  | 49(6)   | -57(6)   |
| C(30)  | 155(13) | 260(20) | 132(11) | 70(13)  | -69(10) | -177(16) |
| C(31)  | 250(20) | 74(8)   | 320(30) | -98(12) | 220(20) | -83(11)  |
| C(36)  | 68(4)   | 57(4)   | 37(4)   | -7(3)   | 22(3)   | -17(3)   |
| C(32)  | 34(4)   | 35(4)   | 32(4)   | 1(4)    | 3(3)    | -4(3)    |
| C(33)  | 62(7)   | 71(9)   | 43(7)   | 11(6)   | 10(5)   | 14(6)    |
| C(34)  | 43(7)   | 82(9)   | 63(8)   | 1(7)    | -6(6)   | 0(7)     |
| C(35)  | 74(7)   | 74(8)   | 42(6)   | -1(6)   | -9(5)   | -30(6)   |
| C(37)  | 55(5)   | 37(5)   | 42(5)   | 3(4)    | 21(4)   | -7(4)    |
| C(38)  | 57(6)   | 63(8)   | 50(7)   | 3(6)    | 22(6)   | -2(5)    |
| F(4)   | 65(4)   | 89(5)   | 57(4)   | -2(3)   | 20(3)   | 33(3)    |
| F(5)   | 110(6)  | 47(4)   | 101(7)  | 0(4)    | 30(5)   | 17(4)    |
| F(6)   | 90(5)   | 94(5)   | 86(5)   | 31(4)   | 58(4)   | 35(4)    |
| F(4')  | 27(7)   | 97(13)  | 105(15) | 20(10)  | 1(8)    | 17(8)    |
| F(5')  | 65(8)   | 66(10)  | 43(8)   | -1(7)   | -2(6)   | 44(7)    |
| F(6')  | 91(10)  | 62(9)   | 44(7)   | 0(6)    | 29(7)   | 3(7)     |

---

**Table S5.** Hydrogen coordinates (  $\times 10^4$ ) and isotropic displacement parameters ( $\text{\AA}^2 \times 10^3$ ) for  $[(P^tBu_3)Pd(2-CF_3C_6H_4)(Cl)]_2$  (**10**).

|        | x     | y    | z     | U(eq) |
|--------|-------|------|-------|-------|
| H(2A)  | 11467 | 3761 | 3343  | 76    |
| H(2B)  | 11290 | 4289 | 4150  | 76    |
| H(2C)  | 9697  | 4067 | 3026  | 76    |
| H(3A)  | 10241 | 2940 | 3656  | 77    |
| H(3B)  | 8392  | 3185 | 3404  | 77    |
| H(3C)  | 9231  | 2850 | 4713  | 77    |
| H(4A)  | 12597 | 3282 | 5531  | 73    |
| H(4B)  | 11456 | 3216 | 6505  | 73    |
| H(4C)  | 12280 | 3785 | 6363  | 73    |
| H(6A)  | 5205  | 4084 | 2419  | 79    |
| H(6B)  | 7022  | 3819 | 2630  | 79    |
| H(6C)  | 6866  | 4445 | 2900  | 79    |
| H(7A)  | 4543  | 3411 | 3852  | 77    |
| H(7B)  | 5638  | 3355 | 5358  | 77    |
| H(7C)  | 6367  | 3137 | 4216  | 77    |
| H(8A)  | 4234  | 4371 | 4204  | 76    |
| H(8B)  | 5853  | 4734 | 4856  | 76    |
| H(8C)  | 5299  | 4277 | 5704  | 76    |
| H(10A) | 9310  | 5407 | 4770  | 86    |
| H(10B) | 7702  | 5029 | 4205  | 86    |
| H(10C) | 9460  | 4880 | 3950  | 86    |
| H(11A) | 9024  | 5367 | 6929  | 74    |
| H(11B) | 9015  | 4812 | 7680  | 74    |
| H(11C) | 7419  | 4980 | 6487  | 74    |
| H(12A) | 11697 | 5118 | 6630  | 86    |
| H(12B) | 11940 | 4566 | 5939  | 86    |
| H(12C) | 11639 | 4560 | 7360  | 86    |
| H(14A) | 11827 | 3901 | 8945  | 53    |
| H(15A) | 12873 | 4494 | 10672 | 65    |
| H(16A) | 11021 | 4962 | 11577 | 71    |
| H(17A) | 8143  | 4790 | 10773 | 58    |
| H(21A) | 8557  | 1353 | 12936 | 181   |

|        |      |      |       |     |
|--------|------|------|-------|-----|
| H(21B) | 6664 | 1147 | 12316 | 181 |
| H(21C) | 7016 | 1762 | 12736 | 181 |
| H(22A) | 9061 | 850  | 11404 | 110 |
| H(22B) | 8457 | 1009 | 9880  | 110 |
| H(22C) | 7164 | 732  | 10544 | 110 |
| H(23A) | 9934 | 1782 | 12013 | 97  |
| H(23B) | 8762 | 2282 | 11401 | 97  |
| H(23C) | 9421 | 1891 | 10463 | 97  |
| H(21D) | 7964 | 1243 | 12938 | 112 |
| H(21E) | 6265 | 1028 | 11917 | 112 |
| H(21F) | 6323 | 1616 | 12531 | 112 |
| H(22D) | 9852 | 1255 | 11356 | 100 |
| H(22E) | 9294 | 1641 | 10101 | 100 |
| H(22F) | 8507 | 1052 | 10036 | 100 |
| H(23D) | 9295 | 2045 | 12625 | 108 |
| H(23E) | 7472 | 2319 | 12160 | 108 |
| H(23F) | 8725 | 2370 | 11269 | 108 |
| H(25A) | 2958 | 2973 | 9288  | 80  |
| H(25B) | 2816 | 2468 | 8335  | 80  |
| H(25C) | 4437 | 2849 | 8641  | 80  |
| H(26A) | 2827 | 2520 | 11232 | 74  |
| H(26B) | 4098 | 2043 | 11850 | 74  |
| H(26C) | 2532 | 1937 | 10579 | 74  |
| H(27A) | 5242 | 3040 | 11401 | 71  |
| H(27B) | 6547 | 2896 | 10598 | 71  |
| H(27C) | 6521 | 2549 | 11858 | 71  |
| H(25D) | 1870 | 2623 | 9207  | 108 |
| H(25E) | 2062 | 1995 | 8983  | 108 |
| H(25F) | 2771 | 2421 | 8150  | 108 |
| H(26D) | 3435 | 2563 | 11649 | 108 |
| H(26E) | 5124 | 2218 | 12169 | 108 |
| H(26F) | 3392 | 1930 | 11405 | 108 |
| H(27D) | 4464 | 3129 | 10283 | 131 |
| H(27E) | 5034 | 2901 | 9070  | 131 |
| H(27F) | 6292 | 2867 | 10530 | 131 |
| H(29A) | 2794 | 677  | 9966  | 130 |
| H(29B) | 2911 | 1274 | 10534 | 130 |

|        |      |      |       |     |
|--------|------|------|-------|-----|
| H(29C) | 4486 | 877  | 11020 | 130 |
| H(30A) | 2021 | 968  | 7837  | 307 |
| H(30B) | 3126 | 1376 | 7268  | 307 |
| H(30C) | 2105 | 1588 | 8236  | 307 |
| H(31A) | 4360 | 408  | 8467  | 276 |
| H(31B) | 6125 | 618  | 9404  | 276 |
| H(31C) | 5444 | 833  | 7926  | 276 |
| H(33A) | 3519 | 2309 | 6279  | 72  |
| H(34A) | 1808 | 1992 | 4328  | 81  |
| H(35A) | 2619 | 1247 | 3282  | 82  |
| H(33B) | 8070 | 1049 | 7640  | 39  |
| H(34B) | 7812 | 468  | 5856  | 69  |
| H(35B) | 5520 | 496  | 4093  | 62  |

---

## X ray crystallographic data for [(1-AdP<sup>t</sup>Bu<sub>2</sub>)Pd(Ph)(Cl)]<sub>2</sub> (11)

### Data Collection

A pale yellow plate crystal of C<sub>48</sub>H<sub>76</sub>Cl<sub>2</sub>P<sub>2</sub>Pd<sub>2</sub> having approximate dimensions of 0.20 x 0.20 x 0.08 mm<sup>3</sup> was mounted with epoxy cement on the tip of a fine glass fiber. All measurements were made on a Nonius KappaCCD diffractometer with graphite monochromated Mo-K $\alpha$  radiation.

Cell constants and an orientation matrix for data collection corresponded to a primitive monoclinic cell with dimensions:

$$\begin{aligned} a &= 15.251(3) \text{ \AA} & \alpha &= 90^\circ \\ b &= 14.575(3) \text{ \AA} & \beta &= 90.64(3)^\circ \\ c &= 20.401(4) \text{ \AA} & \gamma &= 90^\circ \\ V &= 4534.3(16) \text{ \AA}^3 \end{aligned}$$

For  $Z = 4$  and F.W. = 998.73, the calculated density is 1.463 g/cm<sup>3</sup>. Based on a statistical analysis of intensity distribution, and the successful solution and refinement of the structure, the space group was determined to be  $P2_1/n$  (#14).

The data were collected at a temperature of 173(2) K to a maximum  $2\theta$  value of 56.58°. Four omega scans consisting of 47, 47, 43, and 21 data frames, respectively, were collected with a frame width of 1.6° and a detector-to-crystal distance,  $D_x$ , of 35.0 mm. Each frame was exposed twice (for the purpose of de-zinging) for a total of 80 s. The data frames were processed and scaled using the DENZO software package.<sup>3</sup>

### Data Reduction

A total of 17957 reflections were collected of which 11194 were unique and observed ( $R_{\text{int}} = 0.0282$ ). The linear absorption coefficient,  $\mu$ , for Mo-K $\alpha$  radiation is  $10.14 \text{ cm}^{-1}$ , and no absorption correction was applied. The data were corrected for Lorentz and polarization effects.

### Structure Solution and Refinement

The structure was solved by direct methods and expanded using Fourier techniques<sup>4</sup>. The non-hydrogen atoms were refined anisotropically, and hydrogen atoms were treated as idealized contributions. The final cycle of full-matrix least-squares refinement<sup>5</sup> on F was based on 11194 observed reflections ( $I > 2.00\sigma(I)$ ) and 487 variable parameters and converged with unweighted and weighted agreement factors of:

$$R = \Sigma ||F_o| - |F_c|| / \Sigma |F_o| = 0.0386$$

$$R_w = \{ \Sigma [w (F_o^2 - F_c^2)^2] / \Sigma [w(F_o^2)^2] \}^{1/2} = 0.0954$$

The maximum and minimum peaks on the final difference Fourier map corresponded to 0.409 and  $-0.772 \text{ e}^{-}/\text{\AA}^3$  respectively.

### Structural Description

The compound crystallized in the monoclinic space group  $P2_1/n$  with one molecule in the asymmetric unit and four molecules in the unit cell. Pd(1) and Pd(2) are separated by  $3.78 \text{ \AA}$  and bridged by two  $\mu_2$ -chloride ligands that are separated by  $3.12 \text{ \AA}$ . The chloride ligands possess dissimilar Pd-Cl bond distances with shorter Pd-Cl(1) bonds than Pd-Cl(2) on the order of  $0.1 \text{ \AA}$ . This is probably caused by the steric congestion of the neighboring phosphine ligands. The mean deviations of the palladium coordination

planes are 0.06 Å for Pd(1) and 0.15 Å for Pd(2) and these planes intersect at an angle of 166.3 ° as illustrated in Figure 3. The molecule possesses a pseudo-mirror plane that bisects the Cl-Cl vector. The asymmetry is caused by slight differences in the palladium planes and the offsetting orientations of the their respective phenyl rings (88.1 vs. 99.5 °). There are no significant intermolecular contacts.

**Figure S7**

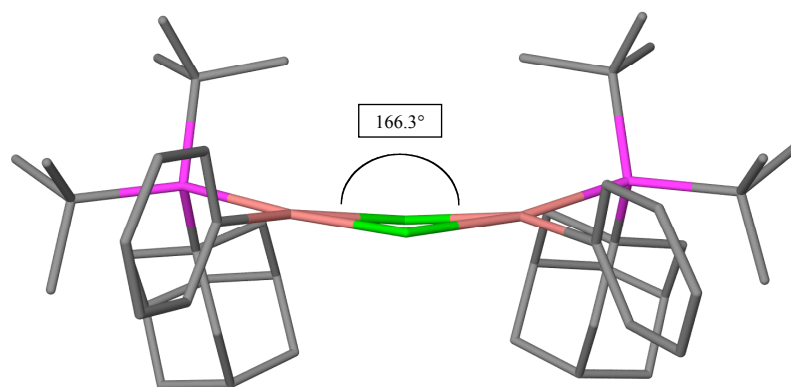



**Table S6.** Crystal data and structure refinement for [(1-AdP<sup>t</sup>Bu<sub>2</sub>)Pd(Ph)(Cl)]<sub>2</sub> (**11**).

|                                   |                                                                                |                |
|-----------------------------------|--------------------------------------------------------------------------------|----------------|
| Empirical formula                 | C <sub>48</sub> H <sub>76</sub> Cl <sub>2</sub> P <sub>2</sub> Pd <sub>2</sub> |                |
| Formula weight                    | 998.73                                                                         |                |
| Temperature                       | 173(2) K                                                                       |                |
| Wavelength                        | 0.71073 Å                                                                      |                |
| Crystal system                    | Monoclinic                                                                     |                |
| Space group                       | P2(1)/n                                                                        |                |
| Unit cell dimensions              | a = 15.251(3) Å                                                                | ∠ = 90°.       |
|                                   | b = 14.575(3) Å                                                                | ∠ = 90.64(3)°. |
|                                   | c = 20.401(4) Å                                                                | ∠ = 90°.       |
| Volume                            | 4534.3(16) Å <sup>3</sup>                                                      |                |
| Z                                 | 4                                                                              |                |
| Density (calculated)              | 1.463 g/cm <sup>3</sup>                                                        |                |
| Absorption coefficient            | 10.14 cm <sup>-1</sup>                                                         |                |
| F(000)                            | 2080                                                                           |                |
| Crystal size                      | 0.20 x 0.08 x 0.08 mm <sup>3</sup>                                             |                |
| Theta range for data collection   | 1.68 to 28.29°.                                                                |                |
| Index ranges                      | -20 ≤ h ≤ 20, -19 ≤ k ≤ 19, -27 ≤ l ≤ 27                                       |                |
| Reflections collected             | 17957                                                                          |                |
| Independent reflections           | 11194 [R(int) = 0.0282]                                                        |                |
| Completeness to theta = 28.29°    | 99.3 %                                                                         |                |
| Absorption correction             | None                                                                           |                |
| Max. and min. transmission        | 0.9233 and 0.8229                                                              |                |
| Refinement method                 | Full-matrix least-squares on F <sup>2</sup>                                    |                |
| Data / restraints / parameters    | 11194 / 0 / 487                                                                |                |
| Goodness-of-fit on F <sup>2</sup> | 1.006                                                                          |                |
| Final R indices [I > 2σ(I)]       | R1 = 0.0386, wR2 = 0.0954                                                      |                |
| R indices (all data)              | R1 = 0.0600, wR2 = 0.1042                                                      |                |
| Largest diff. peak and hole       | 0.409 and -0.772 e.Å <sup>-3</sup>                                             |                |

**Table S7.** Atomic coordinates ( $\times 10^4$ ) and equivalent isotropic displacement parameters ( $\text{\AA}^2 \times 10^3$ ) for [(1-AdP'Bu<sub>2</sub>)Pd(Ph)(Cl)]<sub>2</sub> (**11**). U(eq) is defined as one third of the trace of the orthogonalized U<sup>ij</sup> tensor.

|       | x        | y        | z       | U(eq) |
|-------|----------|----------|---------|-------|
| Pd(1) | 59(1)    | 10049(1) | 3337(1) | 21(1) |
| Pd(2) | -1397(1) | 7955(1)  | 3300(1) | 19(1) |
| Cl(1) | -1300(1) | 9467(1)  | 3775(1) | 24(1) |
| Cl(2) | -129(1)  | 8615(1)  | 2686(1) | 36(1) |
| P(1)  | 1428(1)  | 10607(1) | 3012(1) | 21(1) |
| P(2)  | -1415(1) | 6393(1)  | 3001(1) | 19(1) |
| C(1)  | 1490(2)  | 10497(2) | 2068(1) | 23(1) |
| C(2)  | 598(2)   | 10827(2) | 1785(2) | 30(1) |
| C(3)  | 2240(2)  | 11029(2) | 1731(2) | 29(1) |
| C(4)  | 1602(2)  | 9485(2)  | 1861(1) | 25(1) |
| C(5)  | 563(2)   | 10735(2) | 1038(2) | 35(1) |
| C(6)  | 1307(2)  | 11287(3) | 732(2)  | 40(1) |
| C(7)  | 2190(2)  | 10919(3) | 982(2)  | 37(1) |
| C(8)  | 2278(2)  | 9916(2)  | 795(2)  | 40(1) |
| C(9)  | 1543(2)  | 9372(2)  | 1109(2) | 34(1) |
| C(10) | 660(2)   | 9730(3)  | 859(2)  | 40(1) |
| C(11) | 2280(2)  | 9811(2)  | 3423(2) | 28(1) |
| C(12) | 2402(2)  | 10094(2) | 4147(2) | 40(1) |
| C(13) | 1912(2)  | 8828(2)  | 3431(2) | 33(1) |
| C(14) | 3186(2)  | 9792(2)  | 3101(2) | 34(1) |
| C(15) | 1777(2)  | 11855(2) | 3207(2) | 28(1) |
| C(16) | 1595(2)  | 12156(2) | 3913(2) | 35(1) |
| C(17) | 2768(2)  | 12008(2) | 3102(2) | 36(1) |
| C(18) | 1241(2)  | 12534(2) | 2776(2) | 35(1) |
| C(19) | -161(2)  | 11112(2) | 3917(1) | 24(1) |
| C(20) | 36(2)    | 11071(2) | 4585(2) | 29(1) |
| C(21) | -234(2)  | 11757(2) | 5003(2) | 35(1) |
| C(22) | -711(2)  | 12492(2) | 4763(2) | 43(1) |
| C(23) | -908(2)  | 12544(2) | 4102(2) | 39(1) |
| C(24) | -643(2)  | 11853(2) | 3676(2) | 29(1) |

|       |          |         |         |       |
|-------|----------|---------|---------|-------|
| C(25) | -1244(2) | 6347(2) | 2065(1) | 21(1) |
| C(26) | -1831(2) | 7127(2) | 1778(1) | 24(1) |
| C(27) | -281(2)  | 6572(2) | 1893(1) | 25(1) |
| C(28) | -1471(2) | 5433(2) | 1718(1) | 26(1) |
| C(29) | -1718(2) | 7194(2) | 1030(2) | 29(1) |
| C(30) | -762(2)  | 7420(2) | 887(2)  | 32(1) |
| C(31) | -173(2)  | 6647(2) | 1144(2) | 28(1) |
| C(32) | -420(2)  | 5748(2) | 814(2)  | 33(1) |
| C(33) | -1366(2) | 5522(2) | 971(2)  | 29(1) |
| C(34) | -1969(2) | 6279(2) | 709(2)  | 33(1) |
| C(35) | -2421(2) | 5625(2) | 3184(2) | 25(1) |
| C(36) | -2217(2) | 4599(2) | 3104(2) | 37(1) |
| C(37) | -2777(2) | 5746(2) | 3886(2) | 34(1) |
| C(38) | -3187(2) | 5869(2) | 2728(2) | 29(1) |
| C(39) | -426(2)  | 5846(2) | 3448(2) | 28(1) |
| C(40) | 332(2)   | 6543(2) | 3457(2) | 36(1) |
| C(41) | -660(2)  | 5680(3) | 4168(2) | 40(1) |
| C(42) | -86(2)   | 4943(2) | 3156(2) | 39(1) |
| C(43) | -2540(2) | 7877(2) | 3748(2) | 25(1) |
| C(44) | -2579(2) | 7828(2) | 4431(2) | 36(1) |
| C(45) | -3385(3) | 7864(3) | 4739(2) | 50(1) |
| C(46) | -4145(3) | 7975(2) | 4381(2) | 51(1) |
| C(47) | -4113(2) | 8059(2) | 3701(2) | 43(1) |
| C(48) | -3303(2) | 8014(2) | 3385(2) | 29(1) |

---

**Table S8.** Bond lengths [Å] and angles [°] for [(1-AdP<sup>t</sup>Bu<sub>2</sub>)Pd(Ph)(Cl)]<sub>2</sub> (**11**).

|             |            |                   |           |
|-------------|------------|-------------------|-----------|
| Pd(1)-C(19) | 1.980(3)   | C(21)-C(22)       | 1.382(5)  |
| Pd(1)-P(1)  | 2.3436(9)  | C(22)-C(23)       | 1.380(5)  |
| Pd(1)-Cl(1) | 2.4193(9)  | C(23)-C(24)       | 1.393(4)  |
| Pd(1)-Cl(2) | 2.4922(9)  | C(25)-C(28)       | 1.545(4)  |
| Pd(2)-C(43) | 1.979(3)   | C(25)-C(27)       | 1.549(4)  |
| Pd(2)-P(2)  | 2.3571(9)  | C(25)-C(26)       | 1.557(4)  |
| Pd(2)-Cl(1) | 2.4110(8)  | C(26)-C(29)       | 1.541(4)  |
| Pd(2)-Cl(2) | 2.5086(10) | C(27)-C(31)       | 1.541(4)  |
| P(1)-C(11)  | 1.926(3)   | C(28)-C(33)       | 1.540(4)  |
| P(1)-C(1)   | 1.936(3)   | C(29)-C(30)       | 1.527(4)  |
| P(1)-C(15)  | 1.937(3)   | C(29)-C(34)       | 1.532(4)  |
| P(2)-C(39)  | 1.926(3)   | C(30)-C(31)       | 1.530(5)  |
| P(2)-C(25)  | 1.930(3)   | C(31)-C(32)       | 1.519(4)  |
| P(2)-C(35)  | 1.940(3)   | C(32)-C(33)       | 1.518(4)  |
| C(1)-C(4)   | 1.544(4)   | C(33)-C(34)       | 1.529(4)  |
| C(1)-C(3)   | 1.548(4)   | C(35)-C(38)       | 1.528(4)  |
| C(1)-C(2)   | 1.548(4)   | C(35)-C(36)       | 1.536(4)  |
| C(2)-C(5)   | 1.530(4)   | C(35)-C(37)       | 1.546(4)  |
| C(3)-C(7)   | 1.537(4)   | C(39)-C(42)       | 1.537(4)  |
| C(4)-C(9)   | 1.545(4)   | C(39)-C(41)       | 1.534(4)  |
| C(5)-C(10)  | 1.518(5)   | C(39)-C(40)       | 1.539(4)  |
| C(5)-C(6)   | 1.529(5)   | C(43)-C(48)       | 1.387(4)  |
| C(6)-C(7)   | 1.532(5)   | C(43)-C(44)       | 1.396(4)  |
| C(7)-C(8)   | 1.517(5)   | C(44)-C(45)       | 1.387(5)  |
| C(8)-C(9)   | 1.519(5)   | C(45)-C(46)       | 1.373(6)  |
| C(9)-C(10)  | 1.526(5)   | C(46)-C(47)       | 1.393(6)  |
| C(11)-C(13) | 1.539(4)   | C(47)-C(48)       | 1.403(4)  |
| C(11)-C(14) | 1.538(4)   |                   |           |
| C(11)-C(12) | 1.542(5)   | C(19)-Pd(1)-P(1)  | 93.18(9)  |
| C(15)-C(16) | 1.534(4)   | C(19)-Pd(1)-Cl(1) | 84.39(8)  |
| C(15)-C(17) | 1.545(4)   | P(1)-Pd(1)-Cl(1)  | 174.68(3) |
| C(15)-C(18) | 1.550(4)   | C(19)-Pd(1)-Cl(2) | 162.88(8) |
| C(19)-C(24) | 1.392(4)   | P(1)-Pd(1)-Cl(2)  | 103.74(3) |
| C(19)-C(20) | 1.393(4)   | Cl(1)-Pd(1)-Cl(2) | 78.96(3)  |
| C(20)-C(21) | 1.380(4)   | C(43)-Pd(2)-P(2)  | 93.28(8)  |

|                   |            |                   |            |
|-------------------|------------|-------------------|------------|
| C(43)-Pd(2)-Cl(1) | 85.28(8)   | C(8)-C(9)-C(4)    | 109.1(3)   |
| P(2)-Pd(2)-Cl(1)  | 170.91(3)  | C(10)-C(9)-C(4)   | 109.7(3)   |
| C(43)-Pd(2)-Cl(2) | 160.06(9)  | C(5)-C(10)-C(9)   | 109.7(3)   |
| P(2)-Pd(2)-Cl(2)  | 104.30(3)  | C(13)-C(11)-C(14) | 108.5(3)   |
| Cl(1)-Pd(2)-Cl(2) | 78.80(3)   | C(13)-C(11)-C(12) | 106.2(3)   |
| Pd(2)-Cl(1)-Pd(1) | 102.81(3)  | C(14)-C(11)-C(12) | 108.3(3)   |
| Pd(1)-Cl(2)-Pd(2) | 98.04(3)   | C(13)-C(11)-P(1)  | 108.7(2)   |
| C(11)-P(1)-C(1)   | 110.11(14) | C(14)-C(11)-P(1)  | 115.4(2)   |
| C(11)-P(1)-C(15)  | 107.05(14) | C(12)-C(11)-P(1)  | 109.3(2)   |
| C(1)-P(1)-C(15)   | 105.41(13) | C(16)-C(15)-C(17) | 106.1(3)   |
| C(11)-P(1)-Pd(1)  | 105.47(10) | C(16)-C(15)-C(18) | 104.5(3)   |
| C(1)-P(1)-Pd(1)   | 107.86(9)  | C(17)-C(15)-C(18) | 109.9(3)   |
| C(15)-P(1)-Pd(1)  | 120.75(10) | C(16)-C(15)-P(1)  | 114.2(2)   |
| C(39)-P(2)-C(25)  | 109.91(13) | C(17)-C(15)-P(1)  | 112.0(2)   |
| C(39)-P(2)-C(35)  | 106.66(14) | C(18)-C(15)-P(1)  | 109.9(2)   |
| C(25)-P(2)-C(35)  | 106.67(13) | C(24)-C(19)-C(20) | 119.0(3)   |
| C(39)-P(2)-Pd(2)  | 105.67(10) | C(24)-C(19)-Pd(1) | 119.2(2)   |
| C(25)-P(2)-Pd(2)  | 106.79(9)  | C(20)-C(19)-Pd(1) | 121.0(2)   |
| C(35)-P(2)-Pd(2)  | 120.91(10) | C(21)-C(20)-C(19) | 120.8(3)   |
| C(4)-C(1)-C(3)    | 105.8(2)   | C(20)-C(21)-C(22) | 120.1(3)   |
| C(4)-C(1)-C(2)    | 107.1(2)   | C(23)-C(22)-C(21) | 119.8(3)   |
| C(3)-C(1)-C(2)    | 109.3(2)   | C(22)-C(23)-C(24) | 120.6(3)   |
| C(4)-C(1)-P(1)    | 110.93(19) | C(19)-C(24)-C(23) | 119.8(3)   |
| C(3)-C(1)-P(1)    | 116.4(2)   | C(28)-C(25)-C(27) | 106.6(2)   |
| C(2)-C(1)-P(1)    | 107.0(2)   | C(28)-C(25)-C(26) | 109.4(2)   |
| C(5)-C(2)-C(1)    | 111.4(3)   | C(27)-C(25)-C(26) | 107.6(2)   |
| C(7)-C(3)-C(1)    | 111.1(3)   | C(28)-C(25)-P(2)  | 116.8(2)   |
| C(1)-C(4)-C(9)    | 111.6(2)   | C(27)-C(25)-P(2)  | 110.87(19) |
| C(10)-C(5)-C(6)   | 109.5(3)   | C(26)-C(25)-P(2)  | 105.25(19) |
| C(10)-C(5)-C(2)   | 108.8(3)   | C(29)-C(26)-C(25) | 110.4(2)   |
| C(6)-C(5)-C(2)    | 110.0(3)   | C(31)-C(27)-C(25) | 110.7(2)   |
| C(5)-C(6)-C(7)    | 109.5(3)   | C(33)-C(28)-C(25) | 110.8(2)   |
| C(8)-C(7)-C(6)    | 109.5(3)   | C(30)-C(29)-C(34) | 109.9(3)   |
| C(8)-C(7)-C(3)    | 110.3(3)   | C(30)-C(29)-C(26) | 108.7(2)   |
| C(6)-C(7)-C(3)    | 109.1(3)   | C(34)-C(29)-C(26) | 109.7(2)   |
| C(7)-C(8)-C(9)    | 109.2(3)   | C(29)-C(30)-C(31) | 109.6(3)   |
| C(8)-C(9)-C(10)   | 109.5(3)   | C(32)-C(31)-C(30) | 110.0(3)   |

|                   |          |                   |          |
|-------------------|----------|-------------------|----------|
| C(32)-C(31)-C(27) | 110.4(3) | C(42)-C(39)-C(40) | 108.3(3) |
| C(30)-C(31)-C(27) | 108.8(2) | C(41)-C(39)-C(40) | 106.0(3) |
| C(31)-C(32)-C(33) | 109.0(3) | C(42)-C(39)-P(2)  | 115.9(2) |
| C(32)-C(33)-C(34) | 109.8(3) | C(41)-C(39)-P(2)  | 109.2(2) |
| C(32)-C(33)-C(28) | 109.6(3) | C(40)-C(39)-P(2)  | 108.4(2) |
| C(34)-C(33)-C(28) | 109.7(2) | C(48)-C(43)-C(44) | 119.7(3) |
| C(33)-C(34)-C(29) | 109.5(2) | C(48)-C(43)-Pd(2) | 118.9(2) |
| C(38)-C(35)-C(36) | 108.4(2) | C(44)-C(43)-Pd(2) | 120.7(2) |
| C(38)-C(35)-C(37) | 105.3(2) | C(45)-C(44)-C(43) | 119.8(4) |
| C(36)-C(35)-C(37) | 106.5(2) | C(46)-C(45)-C(44) | 120.7(4) |
| C(38)-C(35)-P(2)  | 110.4(2) | C(45)-C(46)-C(47) | 120.0(3) |
| C(36)-C(35)-P(2)  | 112.3(2) | C(46)-C(47)-C(48) | 119.7(4) |
| C(37)-C(35)-P(2)  | 113.5(2) | C(43)-C(48)-C(47) |          |
| C(42)-C(39)-C(41) | 108.6(3) |                   |          |
| 120.0(3)          |          |                   |          |

**Table S9.** Anisotropic displacement parameters ( $\text{\AA}^2 \times 10^3$ ) [(1-AdP'Bu<sub>2</sub>)Pd(Ph)(Cl)]<sub>2</sub> (11). The anisotropic displacement factor exponent takes the form:  $-2h^2 a^* U^{11} + \dots + 2hk a^* b^* U^{12}$  ]

|       | U <sup>11</sup> | U <sup>22</sup> | U <sup>33</sup> | U <sup>23</sup> | U <sup>13</sup> | U <sup>12</sup> |
|-------|-----------------|-----------------|-----------------|-----------------|-----------------|-----------------|
| Pd(1) | 21(1)           | 18(1)           | 23(1)           | -2(1)           | 1(1)            | -3(1)           |
| Pd(2) | 19(1)           | 19(1)           | 20(1)           | -2(1)           | 2(1)            | -3(1)           |
| Cl(1) | 23(1)           | 20(1)           | 30(1)           | -4(1)           | 4(1)            | -2(1)           |
| Cl(2) | 35(1)           | 31(1)           | 41(1)           | -15(1)          | 18(1)           | -15(1)          |
| P(1)  | 20(1)           | 20(1)           | 23(1)           | 1(1)            | -1(1)           | -2(1)           |
| P(2)  | 19(1)           | 18(1)           | 20(1)           | -1(1)           | 1(1)            | 0(1)            |
| C(1)  | 23(1)           | 23(2)           | 22(2)           | 2(1)            | -1(1)           | -2(1)           |
| C(2)  | 27(2)           | 30(2)           | 32(2)           | 5(1)            | -3(1)           | 0(1)            |
| C(3)  | 26(2)           | 33(2)           | 30(2)           | 6(1)            | 3(1)            | -3(1)           |
| C(4)  | 24(2)           | 28(2)           | 25(2)           | 2(1)            | 2(1)            | 1(1)            |
| C(5)  | 30(2)           | 44(2)           | 30(2)           | 5(2)            | -8(1)           | 2(2)            |
| C(6)  | 45(2)           | 48(2)           | 28(2)           | 13(2)           | 0(2)            | 2(2)            |
| C(7)  | 35(2)           | 47(2)           | 29(2)           | 11(2)           | 4(1)            | -8(2)           |
| C(8)  | 42(2)           | 55(2)           | 22(2)           | 2(2)            | 6(1)            | 5(2)            |
| C(9)  | 38(2)           | 37(2)           | 26(2)           | -4(1)           | -2(1)           | 2(2)            |
| C(10) | 48(2)           | 47(2)           | 24(2)           | -1(2)           | -7(2)           | -5(2)           |
| C(11) | 25(2)           | 30(2)           | 30(2)           | 5(1)            | -4(1)           | 4(1)            |
| C(12) | 47(2)           | 45(2)           | 27(2)           | 1(2)            | -8(2)           | 9(2)            |
| C(13) | 35(2)           | 28(2)           | 35(2)           | 9(1)            | 1(1)            | 4(1)            |
| C(14) | 25(2)           | 36(2)           | 41(2)           | 0(2)            | -5(1)           | 7(1)            |
| C(15) | 27(2)           | 24(2)           | 33(2)           | -2(1)           | 2(1)            | -7(1)           |
| C(16) | 33(2)           | 31(2)           | 42(2)           | -9(2)           | -2(1)           | -10(1)          |
| C(17) | 32(2)           | 35(2)           | 40(2)           | -1(2)           | 1(1)            | -16(1)          |
| C(18) | 40(2)           | 19(2)           | 47(2)           | 1(1)            | 2(2)            | -3(1)           |
| C(19) | 24(2)           | 20(1)           | 27(2)           | -2(1)           | 2(1)            | -5(1)           |
| C(20) | 36(2)           | 26(2)           | 25(2)           | 4(1)            | 2(1)            | -1(1)           |
| C(21) | 43(2)           | 35(2)           | 27(2)           | -7(1)           | 1(1)            | -6(2)           |
| C(22) | 46(2)           | 35(2)           | 49(2)           | -16(2)          | 9(2)            | -1(2)           |
| C(23) | 33(2)           | 23(2)           | 59(2)           | -6(2)           | -5(2)           | 5(1)            |
| C(24) | 25(2)           | 25(2)           | 37(2)           | -1(1)           | -2(1)           | -2(1)           |
| C(25) | 22(1)           | 21(1)           | 21(2)           | -2(1)           | 1(1)            | 0(1)            |

|       |       |       |       |        |       |        |
|-------|-------|-------|-------|--------|-------|--------|
| C(26) | 25(2) | 22(2) | 25(2) | -3(1)  | 2(1)  | 2(1)   |
| C(27) | 26(2) | 26(2) | 22(2) | -3(1)  | 3(1)  | 0(1)   |
| C(28) | 29(2) | 19(2) | 29(2) | -2(1)  | 1(1)  | -1(1)  |
| C(29) | 34(2) | 27(2) | 26(2) | 3(1)   | -4(1) | 3(1)   |
| C(30) | 43(2) | 31(2) | 23(2) | 1(1)   | 8(1)  | -5(2)  |
| C(31) | 28(2) | 32(2) | 25(2) | 1(1)   | 9(1)  | -2(1)  |
| C(32) | 41(2) | 32(2) | 25(2) | -6(1)  | 6(1)  | 4(2)   |
| C(33) | 36(2) | 26(2) | 24(2) | -8(1)  | 0(1)  | -3(1)  |
| C(34) | 39(2) | 35(2) | 23(2) | -6(1)  | -4(1) | 0(2)   |
| C(35) | 26(2) | 23(2) | 27(2) | 0(1)   | 6(1)  | -7(1)  |
| C(36) | 45(2) | 22(2) | 44(2) | 1(2)   | 7(2)  | -3(2)  |
| C(37) | 38(2) | 30(2) | 35(2) | 6(1)   | 11(1) | -7(1)  |
| C(38) | 19(1) | 33(2) | 35(2) | -10(1) | 3(1)  | -7(1)  |
| C(39) | 27(2) | 32(2) | 25(2) | 2(1)   | -4(1) | 6(1)   |
| C(40) | 23(2) | 53(2) | 31(2) | -5(2)  | -7(1) | 5(2)   |
| C(41) | 40(2) | 51(2) | 28(2) | 6(2)   | -3(2) | 8(2)   |
| C(42) | 37(2) | 40(2) | 41(2) | 6(2)   | 2(2)  | 15(2)  |
| C(43) | 24(2) | 20(2) | 30(2) | -3(1)  | 9(1)  | -5(1)  |
| C(44) | 41(2) | 38(2) | 28(2) | -5(1)  | 11(1) | -11(2) |
| C(45) | 62(3) | 44(2) | 44(2) | -16(2) | 31(2) | -20(2) |
| C(46) | 42(2) | 36(2) | 77(3) | -16(2) | 39(2) | -11(2) |
| C(47) | 28(2) | 25(2) | 77(3) | -5(2)  | 9(2)  | -4(1)  |
| C(48) | 25(2) | 19(2) | 42(2) | 1(1)   | 5(1)  | 0(1)   |

---



**Table S10.** Hydrogen coordinates ( $\times 10^4$ ) and isotropic displacement parameters ( $\text{\AA}^2 \times 10^3$ ) for [(1-AdP<sup>t</sup>Bu<sub>2</sub>)Pd(Ph)(Cl)]<sub>2</sub> (**11**).

|        | x    | y     | z    | U(eq) |
|--------|------|-------|------|-------|
| H(2A)  | 121  | 10459 | 1978 | 36    |
| H(2B)  | 505  | 11477 | 1908 | 36    |
| H(3A)  | 2199 | 11688 | 1845 | 35    |
| H(3B)  | 2812 | 10797 | 1894 | 35    |
| H(4A)  | 1141 | 9110  | 2068 | 31    |
| H(4B)  | 2178 | 9258  | 2019 | 31    |
| H(5A)  | -13  | 10969 | 870  | 42    |
| H(6A)  | 1248 | 11943 | 851  | 48    |
| H(6B)  | 1275 | 11236 | 249  | 48    |
| H(7A)  | 2675 | 11277 | 778  | 45    |
| H(8A)  | 2853 | 9677  | 948  | 47    |
| H(8B)  | 2245 | 9850  | 312  | 47    |
| H(9A)  | 1603 | 8709  | 992  | 41    |
| H(10A) | 622  | 9658  | 376  | 48    |
| H(10B) | 180  | 9371  | 1056 | 48    |
| H(12A) | 2835 | 9691  | 4357 | 59    |
| H(12B) | 1841 | 10041 | 4373 | 59    |
| H(12C) | 2608 | 10731 | 4169 | 59    |
| H(13A) | 2337 | 8418  | 3644 | 49    |
| H(13B) | 1804 | 8622  | 2980 | 49    |
| H(13C) | 1361 | 8818  | 3673 | 49    |
| H(14A) | 3575 | 9379  | 3347 | 50    |
| H(14B) | 3435 | 10412 | 3102 | 50    |
| H(14C) | 3126 | 9574  | 2649 | 50    |
| H(16A) | 1787 | 12792 | 3975 | 53    |
| H(16B) | 1916 | 11757 | 4219 | 53    |
| H(16C) | 965  | 12112 | 3997 | 53    |
| H(17A) | 2919 | 12645 | 3209 | 54    |
| H(17B) | 2911 | 11884 | 2643 | 54    |
| H(17C) | 3104 | 11593 | 3387 | 54    |
| H(18A) | 1418 | 13164 | 2881 | 53    |
| H(18B) | 615  | 12458 | 2864 | 53    |

|        |       |       |      |    |
|--------|-------|-------|------|----|
| H(18C) | 1352  | 12410 | 2313 | 53 |
| H(20A) | 359   | 10566 | 4754 | 35 |
| H(21A) | -92   | 11723 | 5457 | 42 |
| H(22A) | -902  | 12961 | 5052 | 52 |
| H(23A) | -1227 | 13055 | 3936 | 46 |
| H(24A) | -791  | 11887 | 3223 | 35 |
| H(26A) | -2453 | 7002  | 1879 | 29 |
| H(26B) | -1667 | 7719  | 1984 | 29 |
| H(27A) | -108  | 7158  | 2102 | 29 |
| H(27B) | 109   | 6083  | 2066 | 29 |
| H(28A) | -1079 | 4943  | 1886 | 31 |
| H(28B) | -2082 | 5259  | 1818 | 31 |
| H(29A) | -2104 | 7692  | 852  | 35 |
| H(30A) | -598  | 8005  | 1102 | 39 |
| H(30B) | -682  | 7492  | 409  | 39 |
| H(31A) | 452   | 6795  | 1045 | 34 |
| H(32A) | -31   | 5250  | 975  | 39 |
| H(32B) | -349  | 5802  | 334  | 39 |
| H(33A) | -1529 | 4927  | 758  | 34 |
| H(34A) | -2586 | 6129  | 809  | 39 |
| H(34B) | -1912 | 6327  | 228  | 39 |
| H(36A) | -2741 | 4238  | 3205 | 55 |
| H(36B) | -1739 | 4426  | 3404 | 55 |
| H(36C) | -2041 | 4478  | 2651 | 55 |
| H(37A) | -3282 | 5341  | 3947 | 51 |
| H(37B) | -2957 | 6385  | 3949 | 51 |
| H(37C) | -2316 | 5589  | 4205 | 51 |
| H(38A) | -3691 | 5479  | 2829 | 43 |
| H(38B) | -3015 | 5770  | 2272 | 43 |
| H(38C) | -3346 | 6514  | 2790 | 43 |
| H(40A) | 843   | 6273  | 3680 | 53 |
| H(40B) | 150   | 7097  | 3692 | 53 |
| H(40C) | 485   | 6704  | 3006 | 53 |
| H(41A) | -157  | 5406  | 4398 | 60 |
| H(41B) | -1163 | 5264  | 4190 | 60 |
| H(41C) | -809  | 6266  | 4375 | 60 |
| H(42A) | 421   | 4729  | 3412 | 59 |

|        |       |      |      |    |
|--------|-------|------|------|----|
| H(42B) | 88    | 5045 | 2701 | 59 |
| H(42C) | -551  | 4479 | 3168 | 59 |
| H(44A) | -2055 | 7770 | 4684 | 43 |
| H(45A) | -3410 | 7812 | 5202 | 60 |
| H(46A) | -4694 | 7993 | 4597 | 62 |
| H(47A) | -4638 | 8146 | 3453 | 52 |
| H(48A) | -3276 | 8077 | 2922 | 35 |

---

## X ray crystallographic data for [(CyP<sup>t</sup>Bu<sub>2</sub>)Pd(Ph)(Br)]<sub>2</sub> (15)

### Data Collection

A pale yellow block crystal of C<sub>40</sub>H<sub>68</sub>Br<sub>2</sub>P<sub>2</sub>Pd<sub>2</sub> having approximate dimensions of 0.25 x 0.2 x 0.2 mm was mounted on a glass fiber. All measurements were made on a Nonius KappaCCD diffractometer with graphite monochromated Mo-K $\alpha$  radiation.

Cell constants and an orientation matrix for data collection corresponded to a primitive monoclinic cell with dimensions:

$$a = 14.549(3) \text{ \AA} \quad \alpha = 90^\circ$$

$$b = 14.689(3) \text{ \AA} \quad \beta = 97.19(3)^\circ$$

$$c = 20.017(4) \text{ \AA} \quad \gamma = 90^\circ$$

$$V = 4244.3(15) \text{ \AA}^3$$

For  $Z = 4$  and F.W. = 983.5, the calculated density is 1.539 g/cm<sup>3</sup>. Based on a statistical analysis of intensity distribution, and the successful solution and refinement of the structure, the space group was determined to be:  $P2_1/c$  (#14)

The data were collected at a temperature of 296(2)K to a maximum  $2\theta$  value of 55.94°. Three omega scans consisting of 68, 68, and 49 data frames, respectively, were collected with a frame width of 1.5° and a detector-to-crystal distance,  $D_x$ , of 35 mm. Each frame was exposed twice (for the purpose of de-zingering) for 20s. The data frames were processed and scaled using the DENZO software package.<sup>3</sup>

### Data Reduction

A total of 18273 reflections were collected of which 10077 were unique and observed ( $R_{\text{int}} = 0.0610$ ). The linear absorption coefficient,  $\mu$ , for Mo-K $\alpha$  radiation is 28.31 cm<sup>-1</sup> and no absorption correction was applied. The data were corrected for Lorentz and polarization effects.

### Structure Solution and Refinement

The structure was solved by direct methods and expanded using Fourier techniques<sup>4</sup>. The non-hydrogen atoms were refined anisotropically and hydrogen atoms were refined isotropically. The final cycle of full-matrix least-squares refinement<sup>5</sup> on F was based on 10077 observed reflections ( $I > 2.00\sigma(I)$ ) and 415 variable parameters and converged with unweighted and weighted agreement factors of:

$$R = \Sigma ||F_o| - |F_c|| / \Sigma |F_o| = 0.0419$$

$$R_w = [ \Sigma w (|F_o| - |F_c|)^2 / \Sigma w F_o^2 ]^{1/2} = 0.0827$$

The maximum and minimum peaks on the final difference Fourier map corresponded to 0.459 and -0.561 e<sup>-</sup>/Å<sup>3</sup>, respectively.

### Structural Description

The compound crystallized in the monoclinic space group  $P2_1/c$  with one molecule in the asymmetric unit and four in the unit cell. The geometry about the palladium atoms is square planar with acute Br-Pd-Br angles measured at 82.787(18) and 82.526(18)°. The planes defined by Pd(1), C(1), P(1), Br(1), Br(2) and Pd(2), C(21), P(2), Br(1), Br(2) have mean deviations of 0.0578 and 0.0820Å respectively and are offset by 20.7° (see Figure 4).

Most interesting is the presence of a pseudo-mirror plane with the phosphine ligands in a “*cis-like*” arrangement. The Pd-Br bond lengths are asymmetric with Br(1) possessing lengths  $\sim 0.1\text{\AA}$  longer than Br(2) which is certainly a direct effect of the pseudo-mirror plane and the steric bulk imparted by the phosphine ligands. A search of the Cambridge Crystallographic Database (v. 5.23, April 2002) yielded only three examples  $[(\text{PR}_x)(\text{R})\text{Pd}(\mu\text{-X})]_2$  with a similar “*cis-like*” arrangement. Two of the examples involve bulky P-C-chelating ligands while the third is a fragment of a more complicated tetramer.

**Figure S8**

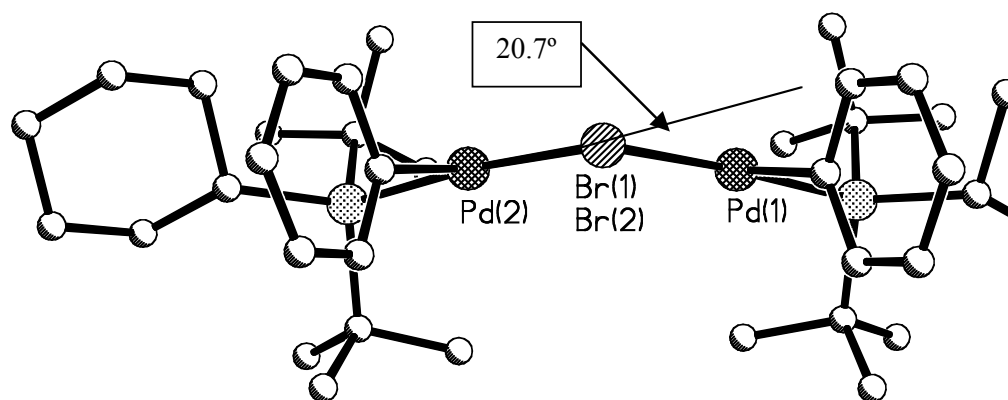

**Table S11.** Crystal data and structure refinement for [(CyP<sup>t</sup>Bu<sub>2</sub>)Pd(Ph)(Br)]<sub>2</sub> (**15**).

|                                   |                                                                                |                |
|-----------------------------------|--------------------------------------------------------------------------------|----------------|
| Empirical formula                 | C <sub>40</sub> H <sub>68</sub> Br <sub>2</sub> P <sub>2</sub> Pd <sub>2</sub> |                |
| Formula weight                    | 983.50                                                                         |                |
| Temperature                       | 296(2) K                                                                       |                |
| Wavelength                        | 0.71073 Å                                                                      |                |
| Crystal system                    | Monoclinic                                                                     |                |
| Space group                       | P2(1)/c                                                                        |                |
| Unit cell dimensions              | a = 14.549(3) Å                                                                | ∠ = 90°.       |
|                                   | b = 14.689(3) Å                                                                | ∠ = 97.19(3)°. |
|                                   | c = 20.017(4) Å                                                                | ∠ = 90°.       |
| Volume                            | 4244.3(15) Å <sup>3</sup>                                                      |                |
| Z                                 | 4                                                                              |                |
| Density (calculated)              | 1.539 g/cm <sup>3</sup>                                                        |                |
| Absorption coefficient            | 28.31 mm <sup>-1</sup>                                                         |                |
| F(000)                            | 2000                                                                           |                |
| Crystal size                      | 0.25 x 0.20 x 0.20 mm <sup>3</sup>                                             |                |
| Theta range for data collection   | 2.31 to 27.97°.                                                                |                |
| Index ranges                      | -19 ≤ h ≤ 19, -17 ≤ k ≤ 19, -26 ≤ l ≤ 26                                       |                |
| Reflections collected             | 18273                                                                          |                |
| Independent reflections           | 10077 [R(int) = 0.0610]                                                        |                |
| Completeness to theta = 27.97°    | 98.4 %                                                                         |                |
| Absorption correction             | None                                                                           |                |
| Max. and min. transmission        | 0.6013 and 0.5379                                                              |                |
| Refinement method                 | Full-matrix least-squares on F <sup>2</sup>                                    |                |
| Data / restraints / parameters    | 10077 / 0 / 415                                                                |                |
| Goodness-of-fit on F <sup>2</sup> | 0.914                                                                          |                |
| Final R indices [I > 2σ(I)]       | R1 = 0.0419, wR2 = 0.0677                                                      |                |
| R indices (all data)              | R1 = 0.1119, wR2 = 0.0827                                                      |                |
| Largest diff. peak and hole       | 0.459 and -0.561 e.Å <sup>-3</sup>                                             |                |

**Table S12.** Atomic coordinates ( $\times 10^4$ ) and equivalent isotropic displacement parameters ( $\text{\AA}^2 \times 10^3$ ) for  $[(\text{CyP}^t\text{Bu}_2)\text{Pd}(\text{Ph})(\text{Br})_2]$  (**15**).  $U(\text{eq})$  is defined as one third of the trace of the orthogonalized  $U_{ij}$  tensor.

|       | x       | y        | z       | $U(\text{eq})$ |
|-------|---------|----------|---------|----------------|
| Pd(1) | 2851(1) | 9501(1)  | 2515(1) | 35(1)          |
| Pd(2) | 1891(1) | 11689(1) | 3139(1) | 34(1)          |
| Br(1) | 1875(1) | 9968(1)  | 3459(1) | 51(1)          |
| Br(2) | 2439(1) | 11073(1) | 2090(1) | 54(1)          |
| P(2)  | 1531(1) | 12370(1) | 4124(1) | 33(1)          |
| P(1)  | 3358(1) | 8061(1)  | 2884(1) | 33(1)          |
| C(1)  | 3437(3) | 9404(2)  | 1667(2) | 37(1)          |
| C(2)  | 2867(3) | 9271(3)  | 1068(2) | 48(1)          |
| C(3)  | 3223(4) | 9265(3)  | 463(2)  | 60(1)          |
| C(4)  | 4151(4) | 9407(3)  | 435(2)  | 67(2)          |
| C(5)  | 4716(4) | 9566(3)  | 1025(2) | 62(1)          |
| C(6)  | 4370(3) | 9572(3)  | 1636(2) | 47(1)          |
| C(7)  | 3860(3) | 7407(3)  | 2215(2) | 41(1)          |
| C(8)  | 3136(3) | 7140(3)  | 1620(2) | 49(1)          |
| C(9)  | 3603(4) | 6879(3)  | 1008(2) | 71(2)          |
| C(10) | 4290(4) | 6114(3)  | 1170(2) | 75(2)          |
| C(11) | 4995(4) | 6351(3)  | 1769(2) | 67(1)          |
| C(12) | 4522(3) | 6602(3)  | 2378(2) | 50(1)          |
| C(13) | 2397(3) | 7344(3)  | 3175(2) | 42(1)          |
| C(14) | 1517(3) | 7529(3)  | 2685(2) | 61(1)          |
| C(15) | 2605(3) | 6320(3)  | 3173(2) | 58(1)          |
| C(16) | 2176(3) | 7601(3)  | 3883(2) | 59(1)          |
| C(17) | 4330(3) | 8199(3)  | 3599(2) | 46(1)          |
| C(18) | 4082(3) | 8955(3)  | 4079(2) | 58(1)          |
| C(19) | 5188(3) | 8539(3)  | 3297(2) | 59(1)          |
| C(20) | 4577(3) | 7328(3)  | 4011(2) | 63(1)          |
| C(21) | 1893(3) | 12876(2) | 2651(2) | 34(1)          |
| C(22) | 1130(3) | 13101(3) | 2199(2) | 44(1)          |
| C(23) | 1118(4) | 13862(3) | 1799(2) | 57(1)          |
| C(24) | 1887(4) | 14413(3) | 1826(2) | 62(1)          |
| C(25) | 2663(4) | 14187(3) | 2247(2) | 56(1)          |



|       |         |          |         |       |
|-------|---------|----------|---------|-------|
| C(26) | 2670(3) | 13424(3) | 2654(2) | 44(1) |
| C(27) | 1110(3) | 13568(2) | 3986(2) | 36(1) |
| C(28) | 173(3)  | 13633(3) | 3544(2) | 46(1) |
| C(29) | 7(3)    | 14595(3) | 3280(2) | 60(1) |
| C(30) | 25(4)   | 15273(3) | 3858(2) | 62(1) |
| C(31) | 914(3)  | 15189(3) | 4334(2) | 52(1) |
| C(32) | 1110(3) | 14232(3) | 4586(2) | 45(1) |
| C(33) | 617(3)  | 11712(3) | 4523(2) | 41(1) |
| C(34) | 1040(3) | 10871(3) | 4906(2) | 54(1) |
| C(35) | -116(3) | 11386(3) | 3958(2) | 57(1) |
| C(36) | 136(3)  | 12286(3) | 5030(2) | 61(1) |
| C(37) | 2644(3) | 12436(3) | 4727(2) | 43(1) |
| C(38) | 3239(3) | 13193(3) | 4469(2) | 57(1) |
| C(39) | 2531(3) | 12637(3) | 5471(2) | 55(1) |
| C(40) | 3185(3) | 11547(3) | 4687(2) | 59(1) |

---

**Table S13.** Bond lengths [Å] and angles [°] for [(CyP<sup>t</sup>Bu<sub>2</sub>)Pd(Ph)(Br)]<sub>2</sub> (**15**).

|             |            |                   |            |
|-------------|------------|-------------------|------------|
| Pd(1)-C(1)  | 1.998(4)   | C(23)-C(24)       | 1.377(6)   |
| Pd(1)-P(1)  | 2.3306(11) | C(24)-C(25)       | 1.362(6)   |
| Pd(1)-Br(2) | 2.5067(6)  | C(25)-C(26)       | 1.387(5)   |
| Pd(1)-Br(1) | 2.5939(8)  | C(27)-C(28)       | 1.533(5)   |
| Pd(2)-C(21) | 1.999(4)   | C(27)-C(32)       | 1.548(5)   |
| Pd(2)-P(2)  | 2.3286(11) | C(28)-C(29)       | 1.517(5)   |
| Pd(2)-Br(2) | 2.5052(7)  | C(29)-C(30)       | 1.525(5)   |
| Pd(2)-Br(1) | 2.6082(7)  | C(30)-C(31)       | 1.511(6)   |
| P(2)-C(27)  | 1.872(4)   | C(31)-C(32)       | 1.509(5)   |
| P(2)-C(37)  | 1.897(4)   | C(33)-C(35)       | 1.532(5)   |
| P(2)-C(33)  | 1.900(4)   | C(33)-C(34)       | 1.541(5)   |
| P(1)-C(7)   | 1.870(4)   | C(33)-C(36)       | 1.552(5)   |
| P(1)-C(17)  | 1.893(4)   | C(37)-C(40)       | 1.532(5)   |
| P(1)-C(13)  | 1.899(4)   | C(37)-C(38)       | 1.537(5)   |
| C(1)-C(2)   | 1.385(5)   | C(37)-C(39)       | 1.548(5)   |
| C(1)-C(6)   | 1.389(6)   |                   |            |
| C(2)-C(3)   | 1.376(5)   | C(1)-Pd(1)-P(1)   | 92.96(11)  |
| C(3)-C(4)   | 1.374(7)   | C(1)-Pd(1)-Br(2)  | 83.53(10)  |
| C(4)-C(5)   | 1.371(6)   | P(1)-Pd(1)-Br(2)  | 175.15(3)  |
| C(5)-C(6)   | 1.380(5)   | C(1)-Pd(1)-Br(1)  | 165.65(11) |
| C(7)-C(12)  | 1.535(5)   | P(1)-Pd(1)-Br(1)  | 100.94(3)  |
| C(7)-C(8)   | 1.539(5)   | Br(2)-Pd(1)-Br(1) | 82.787(18) |
| C(8)-C(9)   | 1.523(5)   | C(21)-Pd(2)-P(2)  | 93.01(10)  |
| C(9)-C(10)  | 1.511(6)   | C(21)-Pd(2)-Br(2) | 83.45(10)  |
| C(10)-C(11) | 1.518(7)   | P(2)-Pd(2)-Br(2)  | 173.39(3)  |
| C(11)-C(12) | 1.520(6)   | C(21)-Pd(2)-Br(1) | 165.06(10) |
| C(13)-C(15) | 1.534(5)   | P(2)-Pd(2)-Br(1)  | 101.44(3)  |
| C(13)-C(14) | 1.537(6)   | Br(2)-Pd(2)-Br(1) | 82.526(18) |
| C(13)-C(16) | 1.539(5)   | Pd(1)-Br(1)-Pd(2) | 93.111(18) |
| C(17)-C(19) | 1.537(6)   | Pd(2)-Br(2)-Pd(1) | 97.807(19) |
| C(17)-C(18) | 1.540(5)   | C(27)-P(2)-C(37)  | 106.48(18) |
| C(17)-C(20) | 1.540(5)   | C(27)-P(2)-C(33)  | 107.85(18) |
| C(21)-C(22) | 1.381(5)   | C(37)-P(2)-C(33)  | 110.14(18) |
| C(21)-C(26) | 1.387(5)   | C(27)-P(2)-Pd(2)  | 112.55(11) |
| C(22)-C(23) | 1.374(5)   | C(37)-P(2)-Pd(2)  | 107.25(13) |

|                   |            |                   |          |
|-------------------|------------|-------------------|----------|
| C(33)-P(2)-Pd(2)  | 112.42(12) | C(26)-C(21)-Pd(2) | 123.6(3) |
| C(7)-P(1)-C(17)   | 106.01(19) | C(23)-C(22)-C(21) | 121.8(4) |
| C(7)-P(1)-C(13)   | 107.70(18) | C(22)-C(23)-C(24) | 120.2(5) |
| C(17)-P(1)-C(13)  | 109.64(18) | C(25)-C(24)-C(23) | 119.2(4) |
| C(7)-P(1)-Pd(1)   | 112.10(13) | C(24)-C(25)-C(26) | 120.4(5) |
| C(17)-P(1)-Pd(1)  | 108.59(13) | C(25)-C(26)-C(21) | 121.3(4) |
| C(13)-P(1)-Pd(1)  | 112.58(13) | C(28)-C(27)-C(32) | 108.8(3) |
| C(2)-C(1)-C(6)    | 118.0(4)   | C(28)-C(27)-P(2)  | 113.3(3) |
| C(2)-C(1)-Pd(1)   | 118.2(3)   | C(32)-C(27)-P(2)  | 120.6(3) |
| C(6)-C(1)-Pd(1)   | 123.3(3)   | C(29)-C(28)-C(27) | 110.5(4) |
| C(3)-C(2)-C(1)    | 120.9(4)   | C(28)-C(29)-C(30) | 111.0(3) |
| C(4)-C(3)-C(2)    | 120.9(4)   | C(31)-C(30)-C(29) | 110.9(4) |
| C(5)-C(4)-C(3)    | 118.6(4)   | C(32)-C(31)-C(30) | 113.4(4) |
| C(4)-C(5)-C(6)    | 121.2(5)   | C(31)-C(32)-C(27) | 110.2(3) |
| C(5)-C(6)-C(1)    | 120.4(4)   | C(35)-C(33)-C(34) | 108.3(3) |
| C(12)-C(7)-C(8)   | 108.7(3)   | C(35)-C(33)-C(36) | 108.9(4) |
| C(12)-C(7)-P(1)   | 122.3(3)   | C(34)-C(33)-C(36) | 107.2(3) |
| C(8)-C(7)-P(1)    | 113.2(3)   | C(35)-C(33)-P(2)  | 107.9(3) |
| C(9)-C(8)-C(7)    | 110.8(4)   | C(34)-C(33)-P(2)  | 111.1(3) |
| C(10)-C(9)-C(8)   | 111.4(4)   | C(36)-C(33)-P(2)  | 113.3(3) |
| C(9)-C(10)-C(11)  | 111.2(4)   | C(40)-C(37)-C(38) | 106.5(3) |
| C(10)-C(11)-C(12) | 111.1(4)   | C(40)-C(37)-C(39) | 109.2(3) |
| C(11)-C(12)-C(7)  | 110.5(3)   | C(38)-C(37)-C(39) | 108.5(3) |
| C(15)-C(13)-C(14) | 108.7(3)   | C(40)-C(37)-P(2)  | 109.1(3) |
| C(15)-C(13)-C(16) | 107.9(3)   | C(38)-C(37)-P(2)  | 107.2(3) |
| C(14)-C(13)-C(16) | 106.9(4)   | C(39)-C(37)-P(2)  | 116.0(3) |
| C(15)-C(13)-P(1)  | 112.9(3)   |                   |          |
| C(14)-C(13)-P(1)  | 107.1(3)   |                   |          |
| C(16)-C(13)-P(1)  | 113.2(3)   |                   |          |
| C(19)-C(17)-C(18) | 106.0(3)   |                   |          |
| C(19)-C(17)-C(20) | 109.5(4)   |                   |          |
| C(18)-C(17)-C(20) | 108.9(3)   |                   |          |
| C(19)-C(17)-P(1)  | 107.6(3)   |                   |          |
| C(18)-C(17)-P(1)  | 109.8(3)   |                   |          |
| C(20)-C(17)-P(1)  | 114.6(3)   |                   |          |
| C(22)-C(21)-C(26) | 116.9(4)   |                   |          |
| C(22)-C(21)-Pd(2) | 118.6(3)   |                   |          |

**Table S14.** Anisotropic displacement parameters ( $\text{\AA}^2 \times 10^3$ ) for  $[(\text{CyP}^t\text{Bu}_2)\text{Pd}(\text{Ph})(\text{Br})_2]$  (15). The anisotropic displacement factor exponent takes the form:  $-2h^2 [a^2 U^{11} + \dots + 2hk a^* b^* U^{12}]$

|       | U <sup>11</sup> | U <sup>22</sup> | U <sup>33</sup> | U <sup>23</sup> | U <sup>13</sup> | U <sup>12</sup> |
|-------|-----------------|-----------------|-----------------|-----------------|-----------------|-----------------|
| Pd(1) | 47(1)           | 30(1)           | 29(1)           | 0(1)            | 8(1)            | 2(1)            |
| Pd(2) | 42(1)           | 30(1)           | 30(1)           | -1(1)           | 8(1)            | 0(1)            |
| Br(1) | 79(1)           | 35(1)           | 43(1)           | 2(1)            | 25(1)           | 5(1)            |
| Br(2) | 93(1)           | 34(1)           | 38(1)           | 4(1)            | 25(1)           | 15(1)           |
| P(2)  | 36(1)           | 36(1)           | 29(1)           | -3(1)           | 7(1)            | -3(1)           |
| P(1)  | 37(1)           | 31(1)           | 31(1)           | 3(1)            | 5(1)            | -1(1)           |
| C(1)  | 55(3)           | 25(2)           | 33(2)           | 0(2)            | 13(2)           | 8(2)            |
| C(2)  | 62(3)           | 43(3)           | 39(3)           | 0(2)            | 7(2)            | 8(2)            |
| C(3)  | 97(4)           | 50(3)           | 34(3)           | 1(2)            | 10(3)           | 15(3)           |
| C(4)  | 112(5)          | 52(3)           | 44(3)           | 6(2)            | 38(3)           | 7(3)            |
| C(5)  | 71(4)           | 56(3)           | 66(3)           | 9(3)            | 30(3)           | -2(3)           |
| C(6)  | 64(3)           | 39(3)           | 41(2)           | 3(2)            | 20(2)           | -2(2)           |
| C(7)  | 48(3)           | 37(3)           | 41(2)           | 4(2)            | 9(2)            | 2(2)            |
| C(8)  | 68(3)           | 34(3)           | 46(3)           | 1(2)            | 11(2)           | 5(2)            |
| C(9)  | 108(5)          | 57(3)           | 49(3)           | 0(2)            | 12(3)           | 18(3)           |
| C(10) | 114(5)          | 53(3)           | 68(3)           | -1(3)           | 42(3)           | 25(3)           |
| C(11) | 79(4)           | 50(3)           | 78(4)           | 2(3)            | 28(3)           | 17(3)           |
| C(12) | 56(3)           | 36(3)           | 58(3)           | 4(2)            | 12(2)           | 11(2)           |
| C(13) | 48(3)           | 32(2)           | 49(3)           | 2(2)            | 14(2)           | -5(2)           |
| C(14) | 42(3)           | 65(3)           | 76(3)           | -3(3)           | 4(3)            | -11(3)          |
| C(15) | 68(4)           | 35(3)           | 73(3)           | 2(2)            | 22(3)           | -12(3)          |
| C(16) | 75(4)           | 43(3)           | 64(3)           | 2(2)            | 30(3)           | -6(3)           |
| C(17) | 47(3)           | 45(3)           | 45(2)           | 4(2)            | -3(2)           | -7(2)           |
| C(18) | 70(4)           | 62(3)           | 39(2)           | -1(2)           | -5(2)           | -12(3)          |
| C(19) | 46(3)           | 64(3)           | 65(3)           | 6(2)            | -3(2)           | -12(3)          |
| C(20) | 69(4)           | 62(3)           | 55(3)           | 18(2)           | -12(2)          | 0(3)            |
| C(21) | 45(3)           | 29(2)           | 30(2)           | -4(2)           | 11(2)           | 6(2)            |
| C(22) | 53(3)           | 45(3)           | 34(2)           | 0(2)            | 9(2)            | 1(2)            |
| C(23) | 68(4)           | 63(3)           | 40(3)           | 7(2)            | 8(2)            | 22(3)           |
| C(24) | 97(5)           | 37(3)           | 55(3)           | 11(2)           | 24(3)           | 21(3)           |
| C(25) | 74(4)           | 36(3)           | 63(3)           | -3(2)           | 28(3)           | -5(3)           |

|       |       |       |       |        |       |        |
|-------|-------|-------|-------|--------|-------|--------|
| C(26) | 48(3) | 41(3) | 46(3) | -1(2)  | 14(2) | 3(2)   |
| C(27) | 39(3) | 37(2) | 35(2) | -6(2)  | 16(2) | -3(2)  |
| C(28) | 47(3) | 48(3) | 43(2) | -12(2) | 2(2)  | 7(2)   |
| C(29) | 72(4) | 57(3) | 49(3) | -1(2)  | 3(2)  | 14(3)  |
| C(30) | 92(4) | 41(3) | 53(3) | 1(2)   | 13(3) | 13(3)  |
| C(31) | 68(3) | 43(3) | 50(3) | -15(2) | 24(3) | 2(2)   |
| C(32) | 55(3) | 44(3) | 39(2) | -10(2) | 16(2) | -1(2)  |
| C(33) | 46(3) | 41(3) | 39(2) | -3(2)  | 17(2) | -9(2)  |
| C(34) | 66(3) | 48(3) | 50(3) | 7(2)   | 16(2) | -7(3)  |
| C(35) | 48(3) | 58(3) | 66(3) | -3(2)  | 7(2)  | -18(3) |
| C(36) | 66(4) | 62(3) | 62(3) | -2(2)  | 36(3) | -7(3)  |
| C(37) | 37(3) | 55(3) | 37(2) | -6(2)  | 0(2)  | -1(2)  |
| C(38) | 40(3) | 75(4) | 53(3) | -9(2)  | -1(2) | -10(3) |
| C(39) | 62(3) | 67(3) | 33(2) | -7(2)  | -6(2) | -3(3)  |
| C(40) | 46(3) | 67(3) | 60(3) | -4(2)  | -4(2) | 7(3)   |

---

**Table S15.** Hydrogen coordinates ( $\times 10^4$ ) and isotropic displacement parameters ( $\text{\AA}^2 \times 10^3$ ) for  $[(\text{CyP}^t\text{Bu}_2)\text{Pd}(\text{Ph})(\text{Br})]_2$  (**15**).

|        | x    | y    | z    | U(eq) |
|--------|------|------|------|-------|
| H(2A)  | 2234 | 9186 | 1074 | 57    |
| H(3A)  | 2830 | 9162 | 66   | 72    |
| H(4A)  | 4390 | 9396 | 26   | 80    |
| H(5A)  | 5344 | 9672 | 1012 | 75    |
| H(6A)  | 4765 | 9688 | 2029 | 56    |
| H(7A)  | 4245 | 7858 | 2019 | 50    |
| H(8A)  | 2772 | 6631 | 1749 | 59    |
| H(8B)  | 2719 | 7648 | 1506 | 59    |
| H(9A)  | 3136 | 6691 | 646  | 85    |
| H(9B)  | 3922 | 7405 | 856  | 85    |
| H(10A) | 4607 | 5994 | 781  | 90    |
| H(10B) | 3961 | 5565 | 1269 | 90    |
| H(11A) | 5371 | 6858 | 1652 | 81    |
| H(11B) | 5401 | 5834 | 1878 | 81    |
| H(12A) | 4987 | 6763 | 2751 | 60    |
| H(12B) | 4179 | 6082 | 2514 | 60    |
| H(14A) | 1014 | 7176 | 2816 | 92    |
| H(14B) | 1622 | 7361 | 2237 | 92    |
| H(14C) | 1365 | 8164 | 2695 | 92    |
| H(15A) | 2100 | 5992 | 3325 | 87    |
| H(15B) | 3163 | 6198 | 3468 | 87    |
| H(15C) | 2682 | 6131 | 2724 | 87    |
| H(16A) | 1689 | 7217 | 4004 | 89    |
| H(16B) | 1982 | 8225 | 3885 | 89    |
| H(16C) | 2720 | 7521 | 4202 | 89    |
| H(18A) | 4577 | 9024 | 4441 | 87    |
| H(18B) | 3522 | 8795 | 4259 | 87    |
| H(18C) | 3992 | 9518 | 3836 | 87    |
| H(19A) | 5694 | 8613 | 3649 | 89    |
| H(19B) | 5051 | 9114 | 3078 | 89    |
| H(19C) | 5354 | 8104 | 2975 | 89    |
| H(20A) | 5075 | 7453 | 4360 | 95    |

|        |      |       |      |    |
|--------|------|-------|------|----|
| H(20B) | 4763 | 6862  | 3720 | 95 |
| H(20C) | 4045 | 7125  | 4209 | 95 |
| H(22A) | 611  | 12727 | 2164 | 52 |
| H(23A) | 587  | 14006 | 1508 | 69 |
| H(24A) | 1877 | 14934 | 1561 | 74 |
| H(25A) | 3190 | 14547 | 2260 | 68 |
| H(26A) | 3207 | 13276 | 2936 | 53 |
| H(27A) | 1548 | 13841 | 3709 | 43 |
| H(28A) | 162  | 13214 | 3168 | 56 |
| H(28B) | -318 | 13461 | 3805 | 56 |
| H(29A) | -589 | 14625 | 3003 | 72 |
| H(29B) | 482  | 14755 | 3001 | 72 |
| H(30A) | -30  | 15887 | 3679 | 74 |
| H(30B) | -499 | 15162 | 4103 | 74 |
| H(31A) | 1425 | 15395 | 4105 | 63 |
| H(31B) | 879  | 15587 | 4716 | 63 |
| H(32A) | 642  | 14047 | 4863 | 54 |
| H(32B) | 1708 | 14213 | 4861 | 54 |
| H(34A) | 565  | 10551 | 5103 | 80 |
| H(34B) | 1515 | 11062 | 5254 | 80 |
| H(34C) | 1304 | 10476 | 4599 | 80 |
| H(35A) | -587 | 11051 | 4148 | 86 |
| H(35B) | 170  | 11000 | 3656 | 86 |
| H(35C) | -390 | 11902 | 3716 | 86 |
| H(36A) | -316 | 11919 | 5215 | 92 |
| H(36B) | -164 | 12801 | 4802 | 92 |
| H(36C) | 590  | 12493 | 5387 | 92 |
| H(38A) | 3809 | 13247 | 4765 | 85 |
| H(38B) | 2909 | 13759 | 4458 | 85 |
| H(38C) | 3372 | 13043 | 4024 | 85 |
| H(39A) | 3131 | 12660 | 5733 | 83 |
| H(39B) | 2169 | 12164 | 5642 | 83 |
| H(39C) | 2224 | 13211 | 5501 | 83 |
| H(40A) | 3749 | 11576 | 4991 | 88 |
| H(40B) | 3328 | 11462 | 4236 | 88 |
| H(40C) | 2816 | 11046 | 4809 | 88 |

---

## REFERENCES

1. Zoellner, R. W., *J. Chem. Educ.* **1990**, *67*, 714.
2. Stambuli, J. P. Ph.D. Dissertation, Yale University, New Haven, CT, 2003.
3. Z. Otwinowski and W. Minor, "Processing of X-Ray Diffraction Data Collected in Oscillation Mode," *Methods in Enzymology*, vol. 276: Macromolecular Crystallography, part A, 307-326, 1997, C.W. Carter, Jr. & R.M. Sweet, Eds., Academic Press.
4. *Acta Cryst.* **A46** (1990) 467-473
5. Least Squares function minimized:  
$$\sum w(F_o^2 - F_c^2)^2$$
